# Supplementary material for: Distinct Genomic Features Between Osteosarcomas Firstly Metastasing to Bone and to Lung
Source: Research Square preprint supplement (doi:10.21203/rs.3.rs-1354631/v1), 2022-02-15
Supplement: Supplementary file 1 [file 1af70f4accda5d1696884891.xlsx]

## Sheet: Sheet1
No.	Group	Age (yr)	Sex	Diagnosis	Primary site	Metastatic site	Matched or unmatched	Survive	Follow-up time (mo)	PFS	Mutation	TMB (Muts/Mb)	MSI status	Neoantigen number	HED	First-line treatment	Second-line treatment	Third-line treatment	Fourth-line treatment
1	A	50	M	Osteosarcoma	Tibia	Rib	Matched	Dod	24	13.3	SNV	1.1	MSS	57	Low	1	1	1	1
2	A	32	M	Osteosarcoma	Pelvis	Pelvis	Matched	Awd	26	14.5	SNV	13	MSS	925	Low	1	1	0	0
3	A	41	M	Osteosarcoma	Tibia	Pelvis	Matched	Dod	42	17.17	SNV	12.2	MSS	397	Low	1	0	0	0
4	A	17	M	Osteosarcoma	Femur	Spine	Matched	Dod	23	8.8	SNV	11.3	MSS	1332	Low	1	1	0	0
5	A	27	F	Osteosarcoma	Spine	Pelvis	Matched	Dod	7	0	SNV	2.8	MSS	822	Low	1	0	0	0
6	A	13	M	Osteosarcoma	Femur	Femur	Matched	Dod	22	9.33	SNV	6.3	MSS	1071	Low	1	1	0	0
7	A	61	F	Osteosarcoma	Femur	Pelvis	Matched	Awd	59	48.23	SNV	32.9	MSI-H	2084	High	0	0	0	0
8	A	6	F	Osteosarcoma	Femur	Fibula	Matched	Awd	14	7	Mixed	2.7	MSS	369	High	1	1	1	0
9	B	9	M	Osteosarcoma	Femur	Fibula	Matched	Awd	25	14.17	Mixed	1.7	MSS	24	Low	1	1	0	0
10	B	11	M	Osteosarcoma	Tibia	Femur	Matched	Awd	15	9.43	Mixed	1.1	MSS	61	Low	1	1	0	0
11	B	7	F	Osteosarcoma	Femur	Tibia	Matched	Awd	12	3.27	Amp	0.5	MSS	57	Low	1	1	0	0
12	B	14	F	Osteosarcoma	Femur	Lung	Matched	Dod	29	11.13	Mixed	2.8	MSS	39	Low	1	1	1	1
13	B	57	M	Osteosarcoma	Humerus	Lung	Matched	Dod	17	2.23	SNV	0.9	MSS	0	Low	1	1	1	1
14	B	15	M	Osteosarcoma	Humerus	Lung	Matched	Awd	9	4.57	SNV	1.3	MSS	46	Low	1	0	0	0
15	B	13	F	Osteosarcoma	Femur	Lung	Matched	Awd	26	9.73	SNV	4.6	MSS	126	Low	1	1	1	1
16	A	14	M	Osteosarcoma	Femur	Sacrum	Unmatched	Awd	19	11.5	FUS	3.7	MSS	173	Low	1	1	1	0
17	A	13	M	Osteosarcoma	Femur	Fibula	Unmatched	Awd	12	5	SNV	4.6	MSS	664	Low	1	1	0	0
18	B	15	F	Osteosarcoma	Femur	Femur	Unmatched	Dod	38	13.33	Mixed	2.4	MSS	60	Low	1	1	1	1
19	B	11	M	Osteosarcoma	Humerus	Tibia	Unmatched	Awd	25	13.73	Mixed	2.4	MSS	176	Low	1	1	0	0
20	B	10	M	Osteosarcoma	Femur	Spine	Unmatched	Awd	36	17.63	Mixed	1.6	MSS	897	Low	1	1	1	0
21	B	10	M	Osteosarcoma	Femur	Lung	Unmatched	Awd	12	6	SNV	1.9	MSS	176	Low	1	1	0	0
22	B	16	M	Osteosarcoma	Femur	Lung	Unmatched	Awd	23	9.17	SNV	4.7	MSS	115	Low	1	1	1	0
23	B	15	M	Osteosarcoma	Femur	Lung	Unmatched	Awd	41	18.5	Mixed	1.8	MSS	37	Low	1	1	1	0
24	B	14	M	Osteosarcoma	Femur	Lung	Unmatched	Dod	45	22.5	Mixed	4.6	MSS	131	Low	1	1	1	1
25	B	12	M	Osteosarcoma	Femur	Lung	Unmatched	Awd	30	20	Mixed	3	MSS	135	Low	1	0	0	0
26	B	35	M	Osteosarcoma	Femur	Lung	Unmatched	Awd	39	22	SNV	4.6	MSS	217	High	1	0	0	0
27	B	14	M	Osteosarcoma	Tibia	Femur	Unmatched	Awd	10	7	SNV	1.8	MSS	50	Low	1	1	0	0
28	A	18	M	Osteosarcoma	Femur	Femur	Unmatched	Awd	51	22.57	SNV	5.1	MSS	852	Low	1	1	1	1
29	A	21	M	Osteosarcoma	Femur	Spine	Unmatched	Awd	48	38.03	SNV	2	MSS	299	Low	1	1	1	0
30	B	16	F	Osteosarcoma	Femur	Lung	Unmatched	Awd	39	30.13	SNV	9.9	MSS	1412	Low	1	1	0	0
31	B	22	M	Osteosarcoma	Tibia	Lung	Unmatched	Awd	30	19.63	SNV	2.4	MSS	195	Low	1	1	0	0
32	B	13	M	Osteosarcoma	Tibia	Lung	Unmatched	Awd	16	8.33	Amp	2.7	MSS	1539	High	1	0	0	0
33	B	23	M	Osteosarcoma	Femur	Lung	Unmatched	Awd	30	15.27	SNV	4.4	MSS	304	Low	1	1	1	0
34	B	6	M	Osteosarcoma	Tibia	Lung	Unmatched	Awd	50	21.83	SNV	3.3	MSS	147	Low	1	1	1	0
35	B	12	M	Osteosarcoma	Femur	Lung	Unmatched	Awd	26	16.9	SNV	14.2	MSS	960	Low	1	1	0	0
36	B	24	F	Osteosarcoma	Tibia	Lung	Unmatched	Awd	54	34.43	Mixed	1.4	MSS	139	High	1	1	0	0
37	B	28	M	Osteosarcoma	Pelvis	Lung	Unmatched	Awd	24	2.7	Mixed	0.8	MSS	60	High	0	1	0	0
38	B	11	M	Osteosarcoma	Femur	Lung	Unmatched	Awd	28	19.67	SNV	0	MSS	28	Low	1	1	0	0
SNV, single nucleotide variation; Amp, amplification; Fus, fusion; TMB, tumor mutation burden; MSI, microsatellite instability; MSS, microsatellite stability; MSI-H, microsatellite instability-high; PFS, progression free survival; Mo, month; OS, overall survival. HED, human leukocyte antigen-I evolutionary divergence. HED score> 7.887, defined as HED high; HED score ≤ 7.887, defined as HED low.
