# Supplementary material for: Distinct Genomic Features Between Osteosarcomas Firstly Metastasing to Bone and to Lung
Source: Research Square preprint supplement (doi:10.21203/rs.3.rs-1354631/v1), 2022-02-15
Supplement: Supplementary file 3 [file d3a152a755449eca5970e99b.xlsx]

## Sheet: Sheet 1
submitter_id.samples	additional_treatment_completion_success_outcome	age_at_initial_pathologic_diagnosis	batch_number	bcr	bcr_followup_barcode	bcr_followup_uuid	submitter_id	contiguous_organ_invaded	contiguous_organ_resection_site	day_of_dcc_upload	day_of_form_completion	days_to_initial_pathologic_diagnosis	days_to_well_differentiated_liposarcoma_primary_dx	days_to_well_differentiated_liposarcoma_resection	file_uuid	history_of_neoadjuvant_treatment	informed_consent_verified	leiomyosarcoma_histologic_subtype	leiomyosarcoma_major_vessel_involvement	local_disease_recurrence	lost_follow_up	margin_status	metastatic_diagnosis	metastatic_site_at_diagnosis_other	mitotic_count	month_of_dcc_upload	month_of_form_completion	mpnst_exisiting_plexiform_neurofibroma	mpnst_neurofibromatosis	mpnst_neurofibromatosis_heredity	mpnst_nf1_genetic_testing	mpnst_specific_mutations	other_contiguous_organ_resection_site	other_dx	patient_id	person_neoplasm_cancer_status	postoperative_rx_tx	primary_tumor_lower_uterus_segment	radiation_therapy	ss18_ssx_fusion_status	ss18_ssx_testing_method	tissue_prospective_collection_indicator	tissue_retrospective_collection_indicator	tissue_source_site	tumor_depth	tumor_necrosis_percent	tumor_total_necrosis_percent	well_differentiated_liposarcoma_primary_dx	withdrawn
TCGA-X6-A8C5-01A	Complete Response	63	375.50.0	Nationwide Children's Hospital	TCGA-X6-A8C5-F68101	2EF00CB2-F3CF-422C-8162-09B952702163	TCGA-X6-A8C5			14	13	0			0793BB19-2AE6-4996-A026-F57A128AF5D1	No	YES	Conventional leiomyosarcoma	No Major Vessel Involvement	NO	NO	Negative	NO			3	11							No	A8C5	TUMOR FREE	NO	NO	NO			NO	YES	X6	Deep		<10% (focal necrosis)		FALSE
TCGA-DX-A8BG-01A	Complete Response	83	426.42.0	Nationwide Children's Hospital	TCGA-DX-A8BG-F68282	A8029058-57F9-4875-ACBA-3F6E33C7C732	TCGA-DX-A8BG			14	14	0			F78E1797-3033-490F-AAF0-DFC76BA0F68A	No	YES			NO	NO	Negative	YES			3	11							Yes	A8BG	TUMOR FREE	NO		YES			YES	NO	DX	Deep	30	Moderate Necrosis (>=10, <50%)		FALSE
TCGA-DX-A7ET-01A	Complete Response	71	375.50.0	Nationwide Children's Hospital	TCGA-DX-A7ET-F65613	868EC4A4-0D05-43FA-883E-EA95459D44EC	TCGA-DX-A7ET			14	25	0			3668A8F1-0453-4274-B579-C8ADE2EAF442	No	YES			NO	NO	Negative	NO		10	3	9							Yes	A7ET	TUMOR FREE	NO		NO			YES	NO	DX	Deep	10	<10% (focal necrosis)		FALSE
TCGA-X9-A973-01A	Progressive Disease	55	396.46.0	Nationwide Children's Hospital	TCGA-X9-A973-F66944	955F4FC1-80FE-4F33-9139-2AE666EBD555	TCGA-X9-A973	NO		14	28	0			3BD86FC1-D6D5-4CF0-92D4-C2673522F384	No	YES			NO	NO	Negative	YES		7	3	10		No					No	A973	WITH TUMOR	YES		NO			NO	YES	X9	Deep	20	Moderate Necrosis (>=10, <50%)		FALSE
TCGA-DX-A48N-01A	Complete Response	47	310.63.0	Nationwide Children's Hospital	TCGA-DX-A48N-F42890	BADB08E8-9CBE-470B-B0FB-AAB9EC87C91A	TCGA-DX-A48N			14	2	0			9CAF48D5-7963-4E9C-BE35-CE8769623557	No	YES				NO	Positive				3	5							No	A48N	TUMOR FREE	NO		NO			NO	YES	DX	Deep			NO	FALSE
TCGA-IE-A4EJ-01A	Complete Response	84	263.66.0	Nationwide Children's Hospital	TCGA-IE-A4EJ-F45210	F51E725D-36E9-47DF-89C8-B8F5526DE14F	TCGA-IE-A4EJ			14	10	0			E64D7907-0BDC-4EB0-858F-D29A1E8D995E	No	YES				YES	Positive			5	3	7							No	A4EJ							YES	NO	IE			0% (no necrosis or no mention of necrosis)		FALSE
TCGA-DX-A6YQ-01A		86	342.56.0	Nationwide Children's Hospital			TCGA-DX-A6YQ			14		0			E5C29276-F6CF-49E8-AA5B-2E4E0CC849F1	No	YES			NO		Negative	NO		21	3								No	A6YQ							NO	YES	DX	Deep	25	Moderate Necrosis (>=10, <50%)		FALSE
TCGA-K1-A3PN-02A	Complete Response	64	229.66.0	Nationwide Children's Hospital	TCGA-K1-A3PN-F49555	3D56A04F-88B3-4876-99F9-07A6066DDD2F	TCGA-K1-A3PN			14	3	0			3A768285-5E94-47BC-928A-AFA2EA6005F2	No	YES	Conventional leiomyosarcoma	No Major Vessel Involvement	NO	NO	Negative	YES	Abdominal wall	5	3	10							No	A3PN	TUMOR FREE	NO	YES	NO			YES	NO	K1	Deep				FALSE
TCGA-QQ-A5VA-01A		60	336.56.0	Nationwide Children's Hospital			TCGA-QQ-A5VA			14		0			015BC44B-3199-4EBB-911D-45BD741F79B5	No	YES			NO		Negative	NO			3								No	A5VA							NO	YES	QQ			0% (no necrosis or no mention of necrosis)		FALSE
TCGA-DX-A240-01A	Complete Response	51	290.65.0	Nationwide Children's Hospital	TCGA-DX-A240-F42825	8EC69DC9-A8F2-4C26-878F-E992B93436FA	TCGA-DX-A240			14	1	0			BDCD35C6-703D-47B1-98E5-874A0BBA1908	No	YES				NO					3	5							No	A240	TUMOR FREE	NO		NO					DX	Superficial				FALSE
TCGA-IW-A3M6-01A		59	218.68.0	Nationwide Children's Hospital	TCGA-IW-A3M6-F32536	C7876819-60D4-48DA-B3A9-97C3076F76C0	TCGA-IW-A3M6	NO		14	31	0			4E8097EF-60DE-430E-B300-4AB375A3CABD	No	YES	Conventional leiomyosarcoma	No Major Vessel Involvement	NO			NO			3	5							Yes	A3M6		YES	YES	NO			NO	YES	IW	Deep		<10% (focal necrosis)		FALSE
TCGA-DX-AB35-01A	Progressive Disease	65	426.42.0	Nationwide Children's Hospital	TCGA-DX-AB35-F72170	3A56F00B-6F72-4701-BABB-04D0803F87CB	TCGA-DX-AB35			14	22	0	-5058	-4868	9132BC38-A132-4555-89B9-C6D9476CA13C	No	YES			YES	NO	Negative	NO			3	4							Yes	AB35	WITH TUMOR	NO		NO			NO	YES	DX	Deep		0% (no necrosis or no mention of necrosis)	YES	FALSE
TCGA-VT-A80J-01A	Stable Disease	49	375.50.0	Nationwide Children's Hospital	TCGA-VT-A80J-F68113	5C377325-791C-456A-AB20-634904059597	TCGA-VT-A80J			14	18	0			5CD21788-E04F-4EF5-A803-626D17A8D036	No	YES			NO	NO	Negative	YES	inguinal lymph node	41	3	3							Yes	A80J	TUMOR FREE	YES		NO			YES	NO	VT	Deep	45	Moderate Necrosis (>=10, <50%)		FALSE
TCGA-SG-A849-01A	Complete Response	78	363.51.0	Nationwide Children's Hospital	TCGA-SG-A849-F70241	B2F6C97D-2836-41A7-9B71-4482B7144DEC	TCGA-SG-A849			14	2	0			E97510A3-3A6F-426C-892B-B838240648AB	No	YES			NO	YES	Positive	NO		26	3	2							Yes	A849	TUMOR FREE	NO		YES			YES	NO	SG	Superficial	30	Moderate Necrosis (>=10, <50%)		FALSE
TCGA-DX-A23U-01A	Complete Response	81	286.63.0	Nationwide Children's Hospital	TCGA-DX-A23U-F42821	3BCCDECC-1124-47C2-8918-DDA676F496F2	TCGA-DX-A23U			14	1	0			FE506734-D945-4EFB-AEE1-45D0850FA511	No	YES				NO					3	5							No	A23U	WITH TUMOR	NO		NO					DX	Deep				FALSE
TCGA-DX-A1L0-01A	Progressive Disease	58	263.66.0	Nationwide Children's Hospital	TCGA-DX-A1L0-F42875	FD59E8B3-36AC-408D-9721-DC77F703927E	TCGA-DX-A1L0			14	2	0			304EA8F3-14DF-4D42-B49E-DF7272AC0CDE	No	YES				NO					3	5							No	A1L0	WITH TUMOR	NO		NO					DX	Deep				FALSE
TCGA-FX-A3NK-01A		53	218.68.0	Nationwide Children's Hospital	TCGA-FX-A3NK-F65836	818E20C7-9981-44A7-8639-8B265AEF6993	TCGA-FX-A3NK			14	30	0			137AFDF0-71BA-45AE-AA84-DE89A07BBA81	No	YES				YES	Negative				3	9							Yes	A3NK		NO		NO			YES	NO	FX	Deep		0% (no necrosis or no mention of necrosis)	NO	FALSE
TCGA-X6-A8C7-01A	Complete Response	24	375.50.0	Nationwide Children's Hospital	TCGA-X6-A8C7-F68308	FE148156-E79E-4BFF-A694-6740F91F4382	TCGA-X6-A8C7			14	14	0			BC94AE7B-4D8A-4048-B2FF-5DAC7A803AEA	No	YES			NO	NO	Negative	NO		15	3	11							No	A8C7	TUMOR FREE	NO		NO			NO	YES	X6	Deep	0	0% (no necrosis or no mention of necrosis)		FALSE
TCGA-QQ-A5VC-01A	Complete Response	63	336.56.0	Nationwide Children's Hospital	TCGA-QQ-A5VC-F66419	0513C072-44CA-4BD9-9895-94F0486E7701	TCGA-QQ-A5VC			14	14	0			D0E02781-1726-4BA7-8B03-DBD5FF96D205	No	YES	Conventional leiomyosarcoma	No Major Vessel Involvement	NO	NO	Negative	NO			3	10							No	A5VC	TUMOR FREE	NO	NO	NO			NO	YES	QQ	Superficial		0% (no necrosis or no mention of necrosis)		FALSE
TCGA-QQ-A5VB-01A		53	375.50.0	Nationwide Children's Hospital			TCGA-QQ-A5VB	YES	Colon	14		0			8150FCDB-C01C-4AC5-B3C3-ACE30E3956FB	No	YES	Poorly differentiated or pleomorphic or epithelioid leiomyosarcoma	Common or superficial femoral vein	YES		Positive	YES	Colon and Small Bowel	7	3					No			No	A5VB			NO				NO	YES	QQ	Deep		<10% (focal necrosis)	NO	FALSE
TCGA-K1-A42X-01A	Progressive Disease	62	263.66.0	Nationwide Children's Hospital	TCGA-K1-A42X-F69526	907ADF5B-9BC0-4367-A303-7C5129337ECC	TCGA-K1-A42X			14	13	0			05667F03-A543-41C7-9E6F-398487669A61	No	YES	Conventional leiomyosarcoma	No Major Vessel Involvement		NO	Negative				3	1							No	A42X	WITH TUMOR	YES	YES	NO			YES	NO	K1					FALSE
TCGA-K1-A3PO-01A	Complete Response	42	218.68.0	Nationwide Children's Hospital	TCGA-K1-A3PO-F49556	DB210A26-6A9C-4E43-801A-0F01353345AE	TCGA-K1-A3PO			14	3	0			AAF75833-A503-460A-9E40-360D42988CBD	No	YES	Conventional leiomyosarcoma	No Major Vessel Involvement	NO	NO	Negative	NO			3	10							No	A3PO	TUMOR FREE	NO	NO	NO			YES	NO	K1	Deep		0% (no necrosis or no mention of necrosis)		FALSE
TCGA-SG-A6Z7-01A		44	336.56.0	Nationwide Children's Hospital			TCGA-SG-A6Z7			14		0			C03AEE1A-259C-4342-AE4C-C526DBBDF3FD	No	YES			NO			NO			3								No	A6Z7							NO	YES	SG	Deep		0% (no necrosis or no mention of necrosis)	NO	FALSE
TCGA-QQ-A8VG-01A	Stable Disease	52	383.48.0	Nationwide Children's Hospital	TCGA-QQ-A8VG-F66901	8A97771E-F052-4063-827B-B0942FA65CC6	TCGA-QQ-A8VG	NO		14	27	0			F0290385-8A71-4639-887E-E069D5F36B69	No	YES			NO	NO	Negative	NO			3	10	YES		Familial				No	A8VG	WITH TUMOR	NO		NO			NO	YES	QQ	Deep	0	0% (no necrosis or no mention of necrosis)		FALSE
TCGA-DX-A23Z-01A	Progressive Disease	74	290.65.0	Nationwide Children's Hospital	TCGA-DX-A23Z-F42824	C78AC6D6-4187-4E6E-999E-DA93978989CE	TCGA-DX-A23Z			14	1	0			C011FAA2-01F8-4DD4-BEED-B4E12B63C20B	No	YES				NO					3	5							No	A23Z	WITH TUMOR	NO		NO					DX	Deep				FALSE
TCGA-DX-A6BF-01A	Complete Response	82	310.63.0	Nationwide Children's Hospital	TCGA-DX-A6BF-F59639	45AC2B2A-C059-483F-88A0-36887E23B63E	TCGA-DX-A6BF			14	25	0			A29BAB77-91FE-450F-A4A6-70EC9400CAE4	No	YES			NO	NO	Positive	NO			3	9							No	A6BF	TUMOR FREE	NO		NO			NO	YES	DX	Deep	25	Moderate Necrosis (>=10, <50%)	NO	FALSE
TCGA-DX-A8BV-01A		57	383.48.0	Nationwide Children's Hospital			TCGA-DX-A8BV			14		0			454FEEB7-D36F-41DA-8EDD-5EBF7E0719F1	No	YES			YES		Negative	YES			3								No	A8BV							NO	YES	DX	Deep		Extensive Necrosis (>50%)		FALSE
TCGA-DX-AB32-01A	Complete Response	51	426.42.0	Nationwide Children's Hospital	TCGA-DX-AB32-F65150	A7A8C9B6-8CED-45E7-ADAD-2184AE15B291	TCGA-DX-AB32			14	18	0			4C5A93FC-D0EB-4E29-9418-B2881418D116	No	YES			NO	NO	Negative	NO			3	9							Yes	AB32	TUMOR FREE	NO		YES			NO	YES	DX	Deep	20	Moderate Necrosis (>=10, <50%)		FALSE
TCGA-DX-A6YX-01A		68	426.42.0	Nationwide Children's Hospital			TCGA-DX-A6YX			14		0			FCB4C7A6-C4F5-4012-9C23-EA0800A811A4	No	YES			NO		Negative	YES			3								No	A6YX							NO	YES	DX	Superficial		<10% (focal necrosis)		FALSE
TCGA-IE-A4EH-01A	Complete Response	35	263.66.0	Nationwide Children's Hospital	TCGA-IE-A4EH-F45209	74E8E502-9CD9-4D98-95C1-144B681991A1	TCGA-IE-A4EH			14	10	0			49D1EE8A-C800-4382-99AB-C5602CB8730F	No	YES	Poorly differentiated or pleomorphic or epithelioid leiomyosarcoma		NO	NO	Negative	NO		16	3	7							No	A4EH	TUMOR FREE	YES	YES	NO			YES	NO	IE			Moderate Necrosis (>=10, <50%)		FALSE
TCGA-DX-A3LS-01A	Progressive Disease	78	218.68.0	Nationwide Children's Hospital	TCGA-DX-A3LS-F42842	645812CC-F293-4DB5-A752-45BC5F876ED3	TCGA-DX-A3LS			14	1	0			9B90CFE9-8544-4D6F-8056-2138D2D71E7E	No	YES				NO					3	5							No	A3LS	WITH TUMOR	NO		NO			NO	YES	DX	Deep			NO	FALSE
TCGA-DX-A1KW-01A	Complete Response	67	263.66.0	Nationwide Children's Hospital	TCGA-DX-A1KW-F42871	2D488747-3151-4F05-8937-1D5EEDC9873F	TCGA-DX-A1KW			14	2	0			BB80CC45-5BB7-4188-B60A-8D256D58FE2E	No	YES				NO					3	5							No	A1KW		NO		NO					DX	Deep				FALSE
TCGA-DX-A1L2-01A	Progressive Disease	78	263.66.0	Nationwide Children's Hospital	TCGA-DX-A1L2-F42878	3DB710E4-3843-49B6-A929-A4C49B1095D9	TCGA-DX-A1L2			14	2	0			B9012DF8-B0D1-46B0-9986-AF0D68C57985	No	YES				NO					3	5							No	A1L2	WITH TUMOR	NO		NO					DX	Deep				FALSE
TCGA-DX-A3UE-01A	Progressive Disease	66	310.63.0	Nationwide Children's Hospital	TCGA-DX-A3UE-F42869	BFDCF243-B00A-4BC4-9D40-74E3969D34BA	TCGA-DX-A3UE			14	2	0			26D37438-5E50-4677-AFEC-A4CC5D3D6EBD	No	YES	Conventional leiomyosarcoma	No Major Vessel Involvement		NO					3	5							No	A3UE	WITH TUMOR	NO	NO	YES			NO	YES	DX	Deep				FALSE
TCGA-IS-A3K6-01A	Progressive Disease	55	218.68.0	Nationwide Children's Hospital	TCGA-IS-A3K6-F38225	ABAA4EC9-7025-42BC-A225-0A398B469C8B	TCGA-IS-A3K6			14	14	0			CBEA35DF-2CD3-414B-A141-ADDDCCE4175D	No	YES	Poorly differentiated or pleomorphic or epithelioid leiomyosarcoma	No Major Vessel Involvement		NO		YES			3	12							Yes	A3K6	WITH TUMOR		YES				NO	YES	IS					FALSE
TCGA-3B-A9HJ-01A	Complete Response	68	396.46.0	Nationwide Children's Hospital	TCGA-3B-A9HJ-F69261	6676C0A6-6CAC-4B26-9224-8F2BB5CD10E4	TCGA-3B-A9HJ	NO		14	31	0			3F6B6450-F272-4498-94A6-A5166BE8A252	No	YES			NO	NO		NO		0	3	12							Yes	A9HJ	TUMOR FREE	NO		YES			NO	YES	3B			0% (no necrosis or no mention of necrosis)	NO	FALSE
TCGA-MO-A47P-01A	Complete Response	37	263.66.0	Nationwide Children's Hospital	TCGA-MO-A47P-F58079	167DA2CD-457F-49C9-B949-A28A3DD47058	TCGA-MO-A47P			14	31	0			51B1C0B1-DB73-4DA8-A705-CA3C9F420672	No	YES				NO					3	3							No	A47P	TUMOR FREE	YES		NO			YES	NO	MO				NO	FALSE
TCGA-QC-AA9N-01A	Complete Response	53	412.44.0	Nationwide Children's Hospital	TCGA-QC-AA9N-F67060	E9DD8BEB-3365-4427-AA33-8EEB3913B8EE	TCGA-QC-AA9N			14	30	0			D4E9B495-3E39-4F4A-A0B0-6AF8E3B25D6E	No	YES			NO	NO	Negative	NO		30	3	10							No	AA9N	TUMOR FREE	NO		NO			YES	NO	QC	Superficial	30	Moderate Necrosis (>=10, <50%)		FALSE
TCGA-HB-A43Z-01A	Complete Response	58	263.66.0	Nationwide Children's Hospital	TCGA-HB-A43Z-F57591	40E2833F-602F-4481-9BA6-EA83DC604C6B	TCGA-HB-A43Z			14	17	0			E582D2B7-2D30-402B-8B0E-58163B6EC120	No	YES	Poorly differentiated or pleomorphic or epithelioid leiomyosarcoma	No Major Vessel Involvement		NO	Negative			10	3	3							Yes	A43Z	TUMOR FREE	YES	YES	YES			YES	NO	HB	Deep				FALSE
TCGA-DX-A48P-01A	Complete Response	54	310.63.0	Nationwide Children's Hospital	TCGA-DX-A48P-F42892	FA2C4CFE-4489-4763-8B41-4B212952E9EB	TCGA-DX-A48P			14	2	0			5F70D242-B23D-4E44-952F-90B6D7DD7236	No	YES	Conventional leiomyosarcoma	No Major Vessel Involvement		NO	Negative				3	5							No	A48P	TUMOR FREE	NO	NO	NO			NO	YES	DX	Deep				FALSE
TCGA-DX-A8BS-01A		68	383.48.0	Nationwide Children's Hospital			TCGA-DX-A8BS			14		0			E69DF5D1-BBC1-4E66-9B71-600A6A039C2B	No	YES			NO		Positive	NO			3								No	A8BS							NO	YES	DX	Deep	30	Moderate Necrosis (>=10, <50%)		FALSE
TCGA-3B-A9HR-01A	Progressive Disease	38	396.46.0	Nationwide Children's Hospital	TCGA-3B-A9HR-F69270	6A02D6CC-B223-4C52-BCC6-A6E6AC2FEAB8	TCGA-3B-A9HR	NO		14	31	0			56F59464-7F8D-4F9B-B5FD-CBE04C052BD8	No	YES	Conventional leiomyosarcoma	No Major Vessel Involvement	NO	NO	Negative	YES		6	3	12							No	A9HR	WITH TUMOR	NO	NO	YES			NO	YES	3B		15	Moderate Necrosis (>=10, <50%)		FALSE
TCGA-FX-A2QS-01A	Complete Response	61	218.68.0	Nationwide Children's Hospital	TCGA-FX-A2QS-F64199	2CC279A3-921F-45E9-AA53-E50DC0DD930D	TCGA-FX-A2QS	NO	Kidney	14	27	0			706F8426-7FBF-421A-96AB-8F1F113DCF26	No	YES				NO	Negative	NO		30	3	8							No	A2QS	TUMOR FREE	NO		NO			YES	NO	FX	Deep	40		NO	FALSE
TCGA-HB-A3L4-01A	Progressive Disease	46	218.68.0	Nationwide Children's Hospital	TCGA-HB-A3L4-F31060	C7BC61A3-004D-43D7-985D-DEAC26B32A54	TCGA-HB-A3L4			14	23	0			5B5723A2-2DB6-49C8-92B2-F93FAA4E238F	No	YES	Poorly differentiated or pleomorphic or epithelioid leiomyosarcoma	No Major Vessel Involvement			Negative	YES		90	3	4							No	A3L4	WITH TUMOR	YES	YES	NO			NO	YES	HB	Deep				FALSE
TCGA-MJ-A68H-01A	Complete Response	57	310.63.0	Nationwide Children's Hospital	TCGA-MJ-A68H-F58618	A18775E8-7D19-4ACE-8C60-ACF6CC26C1D5	TCGA-MJ-A68H			14	17	0			36156F86-1A44-42D2-9BF2-8BCBA7CB2C39	No	YES	Conventional leiomyosarcoma	No Major Vessel Involvement	NO	NO	Negative	NO		17	3	4							No	A68H	TUMOR FREE	NO	NO	NO			NO	YES	MJ	Deep	20	Moderate Necrosis (>=10, <50%)		FALSE
TCGA-DX-A2J0-01A	Progressive Disease	61	218.68.0	Nationwide Children's Hospital	TCGA-DX-A2J0-F42839	A47B4F7B-5C97-4B84-B45A-5FAA003E929D	TCGA-DX-A2J0			14	1	0			D30E4536-7D75-442E-91D8-FA399E69FD9E	No	YES				NO					3	5							No	A2J0	WITH TUMOR	NO		NO					DX	Deep				FALSE
TCGA-PT-A8TR-01A	Complete Response	57	383.48.0	Nationwide Children's Hospital	TCGA-PT-A8TR-F60745	BDFD3468-AF3C-4732-B0FA-4AD2F7B51E9F	TCGA-PT-A8TR			14	7	0			E480F89A-F954-4977-BCCE-D66A77C7E703	No	YES	Poorly differentiated or pleomorphic or epithelioid leiomyosarcoma		NO	NO	Positive	NO		3	3	11							No	A8TR	TUMOR FREE	YES	YES	NO			YES	NO	PT		0	0% (no necrosis or no mention of necrosis)		FALSE
TCGA-DX-A6Z0-01A		78	375.50.0	Nationwide Children's Hospital			TCGA-DX-A6Z0			14		0			98CB9C6D-84F4-49ED-B440-0650927DB054	No	YES			NO		Positive	NO			3								No	A6Z0							NO	YES	DX	Deep		0% (no necrosis or no mention of necrosis)		FALSE
TCGA-DX-A3UF-01A	Progressive Disease	65	310.63.0	Nationwide Children's Hospital	TCGA-DX-A3UF-F42870	4371D8AD-9029-4743-B140-1A667B090209	TCGA-DX-A3UF			14	2	0			30E74A3B-DAF2-414E-8FB1-96D4D1B9A24F	No	YES	Conventional leiomyosarcoma	Inferior vena cava		NO	Positive			10	3	5							No	A3UF	WITH TUMOR	NO	NO	NO			NO	YES	DX	Deep				FALSE
TCGA-JV-A75J-01A		43	336.56.0	Nationwide Children's Hospital			TCGA-JV-A75J	YES	Small Bowel, Mucosa only	14		0			085976BF-C14C-4150-85BF-FFF68E9B263E	No	YES	Conventional leiomyosarcoma	No Major Vessel Involvement	NO		Positive	YES	small bowel, diagphragm, omentum, appendix and pelvic implant	68	3								No	A75J			YES				YES	NO	JV	Deep		Extensive Necrosis (>50%)		FALSE
TCGA-DX-A8BQ-01A	Complete Response	63	383.48.0	Nationwide Children's Hospital	TCGA-DX-A8BQ-F65626	36D0E21F-0215-4E7F-9CA0-88BE24F453F0	TCGA-DX-A8BQ			14	25	0			7BC6E3B0-DDE5-41C2-BD11-BB37C2D0BDA1	No	YES			NO	NO	Negative	NO			3	9							No	A8BQ	TUMOR FREE	NO		YES			NO	YES	DX	Superficial	30	Moderate Necrosis (>=10, <50%)		FALSE
TCGA-IE-A3OV-01A	Progressive Disease	42	229.66.0	Nationwide Children's Hospital	TCGA-IE-A3OV-F42520	EF208088-A229-4096-B7F7-358B2AB8154F	TCGA-IE-A3OV	YES	Kidney	14	23	0			1DF89C9C-90DA-4D70-BD26-6F77BE70B863	No	YES	Poorly differentiated or pleomorphic or epithelioid leiomyosarcoma	No Major Vessel Involvement	YES	NO	Negative	YES		15	3	4							No	A3OV	WITH TUMOR	YES	NO	NO			NO	YES	IE	Deep	1	<10% (focal necrosis)		FALSE
TCGA-DX-A23T-01A	Progressive Disease	40	286.63.0	Nationwide Children's Hospital	TCGA-DX-A23T-F42820	A07ADE27-0B81-4373-A9A7-9E27101DCBC7	TCGA-DX-A23T			14	1	0			B008A949-3FDE-4190-8580-268A1F15849F	No	YES				NO					3	5							No	A23T	WITH TUMOR	NO		NO					DX	Deep				FALSE
TCGA-DX-A7EN-01A	Progressive Disease	53	412.44.0	Nationwide Children's Hospital	TCGA-DX-A7EN-F59977	BAA7E9E6-C42D-4E93-B3B9-39A0E3A30892	TCGA-DX-A7EN			14	27	0			E687EB26-9C14-4ACD-80EE-A1C531C46025	No	YES	Conventional leiomyosarcoma	No Major Vessel Involvement	NO	NO	Positive	NO		40	3	5							No	A7EN	WITH TUMOR	YES	NO	NO			YES	NO	DX	Deep	10	<10% (focal necrosis)		FALSE
TCGA-DX-A2J4-01A	Complete Response	60	218.68.0	Nationwide Children's Hospital	TCGA-DX-A2J4-F42841	9BBF6B36-CFA5-4CFB-8BA8-DE72B3EEB1D0	TCGA-DX-A2J4			14	1	0			088D7C5C-704E-4591-B70D-9FDE66E22BF2	No	YES				NO					3	5							No	A2J4	TUMOR FREE	NO		NO					DX	Deep				FALSE
TCGA-DX-AB3B-01A	Complete Response	28	426.42.0	Nationwide Children's Hospital	TCGA-DX-AB3B-F68093	00278E99-74F9-490B-968D-26B30AECEA2A	TCGA-DX-AB3B			14	13	0			53592B3F-20F6-43D8-A841-8E1A7B97F7DD	No	YES			NO	NO	Negative	NO			3	11							No	AB3B	TUMOR FREE	YES		NO			NO	YES	DX	Deep		0% (no necrosis or no mention of necrosis)		FALSE
TCGA-DX-A7ES-01A	Complete Response	50	412.44.0	Nationwide Children's Hospital	TCGA-DX-A7ES-F65612	E5390E98-759E-485F-BFD7-BB221B6DD163	TCGA-DX-A7ES			14	25	0			6412FC1D-F909-4C71-9777-BF76CDD1C667	No	YES			NO	NO	Positive	NO			3	9							No	A7ES	TUMOR FREE	NO		NO			NO	YES	DX	Deep		0% (no necrosis or no mention of necrosis)	NO	FALSE
TCGA-DX-AB2G-01A	Complete Response	36	412.44.0	Nationwide Children's Hospital	TCGA-DX-AB2G-F65632	A1958960-38B5-4AA6-9FE3-F4FE07477C60	TCGA-DX-AB2G			14	25	0			A1EC73C8-D784-47EF-969A-B73EA9C68CE9	No	YES			NO	NO	Negative	NO			3	9							No	AB2G	TUMOR FREE	NO		NO			YES	NO	DX	Deep	20	Moderate Necrosis (>=10, <50%)	NO	FALSE
TCGA-DX-AB2Q-01A	Complete Response	65	412.44.0	Nationwide Children's Hospital	TCGA-DX-AB2Q-F65635	BA93BD11-110E-4BC3-951B-49CCA40BC38A	TCGA-DX-AB2Q			14	25	0			9927EC74-FBD6-4018-9046-AE3FF7E29658	No	YES			NO	NO	Negative	YES	Groin		3	9							No	AB2Q	TUMOR FREE	NO		YES			NO	YES	DX	Deep	5	<10% (focal necrosis)		FALSE
TCGA-MB-A5Y9-01A	Stable Disease	90	307.63.0	Nationwide Children's Hospital	TCGA-MB-A5Y9-F60269	B6CA68AE-5B95-430F-84AF-12A978E933F0	TCGA-MB-A5Y9			14	4	0			2C83BFCB-7160-40EE-A246-E08A6B59F582	No	YES				YES	Positive			45	3	6							Yes	A5Y9	WITH TUMOR	NO		NO			YES	NO	MB		5	<10% (focal necrosis)		FALSE
TCGA-VT-AB3D-01A	Stable Disease	71	426.42.0	Nationwide Children's Hospital	TCGA-VT-AB3D-F68311	301F0766-3224-498E-A94A-C483A0745C40	TCGA-VT-AB3D			14	18	0			3A2ABD89-1EB9-4F20-9B4C-569ABB7C22B8	No	YES			NO	NO	Negative	NO		13	3	3							No	AB3D	TUMOR FREE	NO		YES			YES	NO	VT	Deep		0% (no necrosis or no mention of necrosis)		FALSE
TCGA-DX-A8BX-01A		52	383.48.0	Nationwide Children's Hospital			TCGA-DX-A8BX			14		0			723064A0-AAB1-406C-8FB7-44D50AC64E54	No	YES			YES		Negative	YES		65	3								No	A8BX							NO	YES	DX	Deep	50	Extensive Necrosis (>50%)		FALSE
TCGA-QQ-A5V9-01A		76	336.56.0	Nationwide Children's Hospital			TCGA-QQ-A5V9			14		0			392F30C0-1182-4E9D-B3EB-C0B9006E7880	No	YES			NO		Negative	NO			3								No	A5V9							NO	YES	QQ			0% (no necrosis or no mention of necrosis)		FALSE
TCGA-X9-A971-01A	Progressive Disease	52	396.46.0	Nationwide Children's Hospital	TCGA-X9-A971-F66937	2834A573-91C5-427D-8AD9-0FB6BBD6A970	TCGA-X9-A971	NO		14	29	0			9875CD4F-DD1B-4388-918A-86BD926FAC0F	No	YES	Poorly differentiated or pleomorphic or epithelioid leiomyosarcoma	No Major Vessel Involvement	NO	NO	Negative	NO		6	3	10	NO	No		No			No	A971	WITH TUMOR	YES	NO	NO			NO	YES	X9	Deep	5	<10% (focal necrosis)		FALSE
TCGA-RN-AAAQ-01A	Progressive Disease	52	412.44.0	Nationwide Children's Hospital	TCGA-RN-AAAQ-F64639	96EBE1AE-2469-432F-A17D-5E83D005511B	TCGA-RN-AAAQ			14	8	0			A2436772-0353-485A-BCC2-2347C61088A5	No	YES				NO		NO		6	3	9		NF1	Familial	No			No	AAAQ	WITH TUMOR	YES		YES			NO	YES	RN	Deep	50	Extensive Necrosis (>50%)		FALSE
TCGA-DX-A8BL-01A	Complete Response	59	426.42.0	Nationwide Children's Hospital	TCGA-DX-A8BL-F68338	2497A6CC-D255-4699-AD3B-001FC1188D87	TCGA-DX-A8BL			14	14	0			F34B88F5-69B0-437C-A3A3-DA98A067E761	No	YES			NO	NO	Negative	NO			3	11							No	A8BL	TUMOR FREE	NO		NO			NO	YES	DX	Deep	5	<10% (focal necrosis)		FALSE
TCGA-DX-A48O-01A	Complete Response	63	310.63.0	Nationwide Children's Hospital	TCGA-DX-A48O-F42891	15AB29AE-A62E-40B2-A5E8-8B9107133737	TCGA-DX-A48O			14	2	0			58DA65D7-D888-4EBF-9B15-80701A393CBE	No	YES	Conventional leiomyosarcoma	No Major Vessel Involvement		NO	Negative				3	5							No	A48O	TUMOR FREE	NO	NO	NO			NO	YES	DX	Deep				FALSE
TCGA-DX-A3LU-01A	Progressive Disease	60	218.68.0	Nationwide Children's Hospital	TCGA-DX-A3LU-F42847	3EBCAD31-08B4-4460-B736-88B3DC1BF4AD	TCGA-DX-A3LU			14	1	0			FF19D7E7-6911-4D95-B0FA-20FBA9375856	No	YES				NO	Positive				3	5							No	A3LU	WITH TUMOR	NO		NO			NO	YES	DX	Deep			NO	FALSE
TCGA-HB-A2OT-01A	Complete Response	78	218.68.0	Nationwide Children's Hospital	TCGA-HB-A2OT-F18424	C766A55F-8DF0-46AF-8A16-6386E2F33E1C	TCGA-HB-A2OT	NO		14	15	0			7465F6D4-9111-4066-B693-D5CCFC7D8888	No	YES			NO		Negative	NO		34	3	11							No	A2OT	TUMOR FREE	NO		YES			NO	YES	HB	Deep		0% (no necrosis or no mention of necrosis)		FALSE
TCGA-DX-A6BA-01A	Progressive Disease	53	310.63.0	Nationwide Children's Hospital	TCGA-DX-A6BA-F59637	5A025C7E-08EA-420B-AF82-0EF796DBD7F5	TCGA-DX-A6BA			14	16	0			5DBBBDAD-9384-4C24-B175-9520055A1F3E	No	YES	Conventional leiomyosarcoma	No Major Vessel Involvement	YES	NO	Negative	YES		28	3	5							No	A6BA	WITH TUMOR	NO	NO	NO			NO	YES	DX	Deep	15	Moderate Necrosis (>=10, <50%)		FALSE
TCGA-K1-A6RT-01A	Progressive Disease	48	342.56.0	Nationwide Children's Hospital	TCGA-K1-A6RT-F69527	5014F5C7-FC4B-4D88-BFF6-5A324895158D	TCGA-K1-A6RT			14	13	0			B0C193DD-325A-4722-B8DB-C375C7585D01	No	YES	Conventional leiomyosarcoma	No Major Vessel Involvement		NO	Negative			12	3	1							No	A6RT	WITH TUMOR	NO	NO	NO			YES	NO	K1	Superficial		0% (no necrosis or no mention of necrosis)		FALSE
TCGA-K1-A6RV-01A	Progressive Disease	67	336.56.0	Nationwide Children's Hospital	TCGA-K1-A6RV-F69529	524BE50B-C1DC-469B-AB9C-7DBA7B4A5FCA	TCGA-K1-A6RV			14	13	0			9F583A52-67EB-4280-B519-6B8D9935FDBC	No	YES	Poorly differentiated or pleomorphic or epithelioid leiomyosarcoma	No Major Vessel Involvement		NO	Positive			42	3	1							No	A6RV	WITH TUMOR	NO	NO	YES			YES	NO	K1	Deep	80	Extensive Necrosis (>50%)		FALSE
TCGA-DX-A23R-01A	Complete Response	55	286.63.0	Nationwide Children's Hospital	TCGA-DX-A23R-F42812	05087C88-0139-4995-B4B4-0DD6F6F3956D	TCGA-DX-A23R			14	1	0			15584336-E613-4821-B999-4C7BAFE29D98	No	YES				YES					3	5							No	A23R	TUMOR FREE	NO		NO					DX	Deep				FALSE
TCGA-PC-A5DP-01A		72	286.63.0	Nationwide Children's Hospital			TCGA-PC-A5DP			14		0			95674DB5-652F-4505-BA83-526EF70C01E1	No	YES	Conventional leiomyosarcoma								3								Yes	A5DP							NO	YES	PC					FALSE
TCGA-K1-A42X-02A	Progressive Disease	62	263.66.0	Nationwide Children's Hospital	TCGA-K1-A42X-F69526	907ADF5B-9BC0-4367-A303-7C5129337ECC	TCGA-K1-A42X			14	13	0			05667F03-A543-41C7-9E6F-398487669A61	No	YES	Conventional leiomyosarcoma	No Major Vessel Involvement		NO	Negative				3	1							No	A42X	WITH TUMOR	YES	YES	NO			YES	NO	K1					FALSE
TCGA-QC-A7B5-01A	Complete Response	75	342.56.0	Nationwide Children's Hospital	TCGA-QC-A7B5-F65070	E1119902-6EE9-460B-807F-D55DC05B6F9A	TCGA-QC-A7B5			14	18	0			26CC7D07-2EF2-4554-AE55-1E882BE6BFDE	No	YES			NO	NO	Positive	NO		44	3	9							No	A7B5	TUMOR FREE	NO		NO			NO	YES	QC	Superficial		0% (no necrosis or no mention of necrosis)		FALSE
TCGA-QQ-A5V2-01A	Complete Response	42	336.56.0	Nationwide Children's Hospital	TCGA-QQ-A5V2-F66420	A97151A5-8773-42AD-809A-878597609BE7	TCGA-QQ-A5V2			14	14	0			B5705D41-EEAE-4B75-B0B9-E832103522FC	No	YES				NO					3	10							No	A5V2							NO	YES	QQ	Superficial		0% (no necrosis or no mention of necrosis)		FALSE
TCGA-IE-A4EI-01A		67	263.66.0	Nationwide Children's Hospital	TCGA-IE-A4EI-F58336	E7451720-0B78-4660-BFB8-487F4EAC467D	TCGA-IE-A4EI			14	7	0			293F5196-A32B-44F9-BF9F-03C39EC1ED78	No	YES	Poorly differentiated or pleomorphic or epithelioid leiomyosarcoma	No Major Vessel Involvement	NO	NO	Negative	NO		12	3	4							No	A4EI		NO	NO	NO			YES	NO	IE			0% (no necrosis or no mention of necrosis)		FALSE
TCGA-DX-A8BR-01A	Complete Response	63	426.42.0	Nationwide Children's Hospital	TCGA-DX-A8BR-F65627	97B6DBEF-E1E2-452C-AE16-4ED724CDDD04	TCGA-DX-A8BR			14	25	0			9377CE53-DDC9-49FB-822F-4D761EF4BE27	No	YES			NO	NO	Negative	NO			3	9							No	A8BR	TUMOR FREE	NO		YES			NO	YES	DX	Deep		0% (no necrosis or no mention of necrosis)		FALSE
TCGA-3B-A9HI-01A	Progressive Disease	68	396.46.0	Nationwide Children's Hospital	TCGA-3B-A9HI-F69153	DC67D21D-0A4F-4D08-93DB-E5474686108A	TCGA-3B-A9HI	YES		14	30	0			7A2A8716-EDAF-4F79-9A6F-5F9202FFB56D	No	YES			YES	YES	Positive	YES		22	3	12							No	A9HI	WITH TUMOR						NO	YES	3B			<10% (focal necrosis)	NO	FALSE
TCGA-X6-A7WB-01A		58	363.51.0	Nationwide Children's Hospital			TCGA-X6-A7WB			14		0			EF279400-18B3-46C7-8268-EA785691D8CC	No	YES	Conventional leiomyosarcoma	No Major Vessel Involvement	NO		Positive	NO			3								No	A7WB			YES				NO	YES	X6	Deep	1	<10% (focal necrosis)		FALSE
TCGA-DX-A6BG-01A	Progressive Disease	51	310.63.0	Nationwide Children's Hospital	TCGA-DX-A6BG-F59600	0133EB09-302B-4780-AE34-254097657CA3	TCGA-DX-A6BG			14	27	0			55E89689-F850-445C-8361-1C53188F03A2	No	YES			YES	NO	Negative	NO			3	5							No	A6BG	WITH TUMOR	NO		NO			NO	YES	DX	Deep		<10% (focal necrosis)	NO	FALSE
TCGA-IS-A3K8-01A	Complete Response	44	218.68.0	Nationwide Children's Hospital	TCGA-IS-A3K8-F38423	BD1473FE-2FD7-416F-AF45-F77437A99BB1	TCGA-IS-A3K8			14	14	0			BB9C32FA-AA80-46D5-92D9-C90E2A29590C	No	YES	Well-differentiated leiomyosarcoma (resembling leiomyoma)	No Major Vessel Involvement		NO					3	12							Yes	A3K8	TUMOR FREE	NO	YES	NO			NO	YES	IS					FALSE
TCGA-DX-A1L1-01A	Progressive Disease	60	263.66.0	Nationwide Children's Hospital	TCGA-DX-A1L1-F42876	116E8CA0-D44F-4B98-9BC8-C18E82CCADAF	TCGA-DX-A1L1			14	2	0			BC028B6F-2842-4A82-AF7B-D732495E879D	No	YES				NO					3	5							No	A1L1	WITH TUMOR	NO		NO					DX	Deep				FALSE
TCGA-N1-A6IA-01A	Progressive Disease	41	336.56.0	Nationwide Children's Hospital	TCGA-N1-A6IA-F59223	69757896-66D1-4B31-A05A-9D293689C47F	TCGA-N1-A6IA			14	6	0			F9FA7274-0D35-4767-8B0D-EEB820FA361C	No	YES	Poorly differentiated or pleomorphic or epithelioid leiomyosarcoma	No Major Vessel Involvement		NO					3	5							No	A6IA	WITH TUMOR	NO	YES	NO			NO	YES	N1	Superficial				FALSE
TCGA-DX-AB2H-01A	Complete Response	80	412.44.0	Nationwide Children's Hospital	TCGA-DX-AB2H-F65633	52177F48-B647-4F66-BC4D-68F1C14A8143	TCGA-DX-AB2H			14	25	0	-7573	-7573	6836EA0B-362B-412D-A0EA-AEE396D60455	No	YES			NO	NO	Negative	NO			3	9							Yes	AB2H	TUMOR FREE	NO		NO			NO	YES	DX	Deep		0% (no necrosis or no mention of necrosis)	YES	FALSE
TCGA-DX-A48U-01A	Complete Response	57	310.63.0	Nationwide Children's Hospital	TCGA-DX-A48U-F42896	1156977A-1C6D-4D66-A8A3-265CA3AA47BD	TCGA-DX-A48U			14	2	0			03AC64F4-C271-4DDE-8075-CF2A2FBEF7B4	No	YES	Conventional leiomyosarcoma	No Major Vessel Involvement		NO	Negative				3	5							No	A48U	TUMOR FREE	NO	NO	NO			NO	YES	DX	Deep				FALSE
TCGA-DX-A2IZ-01A	Complete Response	60	218.68.0	Nationwide Children's Hospital	TCGA-DX-A2IZ-F42838	D4ED4572-1347-4934-A5A1-1FBF07A6ADC0	TCGA-DX-A2IZ			14	1	0			D74F16A1-C474-46C4-83E7-93AE279BF27F	No	YES				YES	Negative				3	5							No	A2IZ	TUMOR FREE	NO		NO					DX	Deep			NO	FALSE
TCGA-SI-A71Q-01A	Complete Response	34	342.56.0	Nationwide Children's Hospital	TCGA-SI-A71Q-F62481	C21D88A5-0578-46D4-BFF8-AAD524CC7B55	TCGA-SI-A71Q			14	17	0			A3DFC8F8-B852-4E83-8DEE-8C0612F8E12F	No	YES			NO	NO	Negative	NO		6	3	7	NO	NF1	Familial	No			No	A71Q	TUMOR FREE	NO		YES			NO	YES	SI	Deep	0	0% (no necrosis or no mention of necrosis)		FALSE
TCGA-3B-A9I3-01A	Complete Response	62	412.44.0	Nationwide Children's Hospital	TCGA-3B-A9I3-F69284	AE7AB2CA-4C91-4998-95EE-C5645BD6444E	TCGA-3B-A9I3	NO		14	31	0			FDE7C7AB-70ED-4349-9EB5-8951FAA44E9B	No	YES	Conventional leiomyosarcoma	No Major Vessel Involvement	NO	NO	Positive	NO			3	12							No	A9I3	TUMOR FREE	NO	NO	NO			NO	YES	3B					FALSE
TCGA-QQ-A8VB-01A	Complete Response	68	383.48.0	Nationwide Children's Hospital	TCGA-QQ-A8VB-F66417	7B7D7EEF-BFEB-4BBD-B950-AA220BF3FA6C	TCGA-QQ-A8VB	NO		14	14	0			1B39FDF5-2BD6-4CEB-96A0-46B9B1E1C015	No	YES			NO	NO	Negative	NO			3	10	YES	NF1					Yes	A8VB	TUMOR FREE	NO		NO			NO	YES	QQ			0% (no necrosis or no mention of necrosis)		FALSE
TCGA-DX-AB2P-01A		79	396.46.0	Nationwide Children's Hospital			TCGA-DX-AB2P			14		0			D73F3CA3-C2A9-4AD1-B5F0-8663C6CA33DE	No	YES			YES		Negative	YES			3								Yes	AB2P							NO	YES	DX	Deep	50	Moderate Necrosis (>=10, <50%)		FALSE
TCGA-PC-A5DO-01A		59	286.63.0	Nationwide Children's Hospital			TCGA-PC-A5DO			14		0			C1DA2705-348F-44A8-9216-9AB64A411D2A	No	YES	Well-differentiated leiomyosarcoma (resembling leiomyoma)				Negative				3								No	A5DO							NO	YES	PC					FALSE
TCGA-HB-A5W3-01A		58	307.63.0	Nationwide Children's Hospital			TCGA-HB-A5W3	YES	Other	14		0			F35ED1CF-C389-4E58-9457-7F64E08B7E47	No	YES	Conventional leiomyosarcoma	No Major Vessel Involvement	NO		Negative	YES			3								Yes	A5W3			NO				YES	NO	HB	Deep		0% (no necrosis or no mention of necrosis)		FALSE
TCGA-QC-A6FX-01A	Complete Response	68	336.56.0	Nationwide Children's Hospital	TCGA-QC-A6FX-F67034	E64C296F-16ED-4803-9520-52D778DF4311	TCGA-QC-A6FX	NO		14	29	0			771DC830-873D-4722-9648-36B1DF2C7DCC	No	YES			NO	NO	Negative	NO		12	3	10							Yes	A6FX	TUMOR FREE	NO		YES			YES	NO	QC	Deep	10	Moderate Necrosis (>=10, <50%)		FALSE
TCGA-DX-A6Z2-01A	Complete Response	82	375.50.0	Nationwide Children's Hospital	TCGA-DX-A6Z2-F65151	42B39904-CEBB-47D2-9EEE-E327BFB4074C	TCGA-DX-A6Z2			14	18	0			E3159F5F-17A9-4080-AFCB-AAE35EEF3547	No	YES	Conventional leiomyosarcoma	Renal vein	NO	NO	Positive	NO			3	9							No	A6Z2	TUMOR FREE	NO	NO	NO			NO	YES	DX	Deep	50	Moderate Necrosis (>=10, <50%)		FALSE
TCGA-FX-A2QS-11A	Complete Response	61	218.68.0	Nationwide Children's Hospital	TCGA-FX-A2QS-F64199	2CC279A3-921F-45E9-AA53-E50DC0DD930D	TCGA-FX-A2QS	NO	Kidney	14	27	0			706F8426-7FBF-421A-96AB-8F1F113DCF26	No	YES				NO	Negative	NO		30	3	8							No	A2QS	TUMOR FREE	NO		NO			YES	NO	FX	Deep	40		NO	FALSE
TCGA-DX-A8BN-01A	Complete Response	78	383.48.0	Nationwide Children's Hospital	TCGA-DX-A8BN-F65196	02D3D86C-6823-48CC-9120-907BB937EB37	TCGA-DX-A8BN			14	19	0			E4384718-7299-4A97-849F-7BBCE9578CA4	No	YES			NO	NO	Positive	NO			3	9							No	A8BN	TUMOR FREE	NO		YES			NO	YES	DX	Deep		0% (no necrosis or no mention of necrosis)		FALSE
TCGA-K1-A3PN-01A	Complete Response	64	229.66.0	Nationwide Children's Hospital	TCGA-K1-A3PN-F49555	3D56A04F-88B3-4876-99F9-07A6066DDD2F	TCGA-K1-A3PN			14	3	0			3A768285-5E94-47BC-928A-AFA2EA6005F2	No	YES	Conventional leiomyosarcoma	No Major Vessel Involvement	NO	NO	Negative	YES	Abdominal wall	5	3	10							No	A3PN	TUMOR FREE	NO	YES	NO			YES	NO	K1	Deep				FALSE
TCGA-DX-A23V-01A	Progressive Disease	57	307.63.0	Nationwide Children's Hospital	TCGA-DX-A23V-F42822	6617DCC2-F16A-45C3-9144-599056128439	TCGA-DX-A23V			14	1	0			3E6FA326-C6FA-47B5-B672-ACAC842AF841	No	YES				NO					3	5							No	A23V	WITH TUMOR	NO		NO					DX	Deep				FALSE
TCGA-DX-A7ER-01A		69	375.50.0	Nationwide Children's Hospital			TCGA-DX-A7ER			14		0			FC9A9393-AAB0-45CF-BBAD-57AD69F06413	No	YES			NO		Negative	NO		5	3								No	A7ER							NO	YES	DX	Deep	40	Moderate Necrosis (>=10, <50%)		FALSE
TCGA-DX-A6YU-01A	Complete Response	50	342.56.0	Nationwide Children's Hospital	TCGA-DX-A6YU-F59937	D42A7602-82DA-4C17-91B2-098841716135	TCGA-DX-A6YU			14	23	0			CEEA9126-8928-4442-A1BF-05C536037BF6	No	YES			NO	NO	Negative	NO			3	5							Yes	A6YU	TUMOR FREE	NO		NO			NO	YES	DX	Deep	5	<10% (focal necrosis)		FALSE
TCGA-DX-AB2E-01A	Progressive Disease	60	412.44.0	Nationwide Children's Hospital	TCGA-DX-AB2E-F65630	BDF525FE-0CA1-4DA9-960B-2963433A655D	TCGA-DX-AB2E			14	25	0			8F16C595-D137-4586-91CA-FE08FBD475D9	No	YES			NO	NO	Positive	YES	intercardiac		3	9							No	AB2E	WITH TUMOR	NO		NO			YES	NO	DX	Deep	15	Moderate Necrosis (>=10, <50%)		FALSE
TCGA-HS-A5NA-01A		65	286.63.0	Nationwide Children's Hospital			TCGA-HS-A5NA	YES	Other	14		0			F4E6EC6B-F61E-4657-862F-F629E8CE24B5	No	YES	Conventional leiomyosarcoma	No Major Vessel Involvement				NO		20	3							bilateral ovaries	No	A5NA			YES				NO	YES	HS	Deep		0% (no necrosis or no mention of necrosis)		FALSE
TCGA-X6-A8C3-01A	Complete Response	59	375.50.0	Nationwide Children's Hospital	TCGA-X6-A8C3-F68058	C9473B39-FB61-49A2-8043-358D227A54EA	TCGA-X6-A8C3			14	13	0			3CA1F936-31FF-41BC-AEAB-E0E35596070A	No	YES			NO	NO	Positive	NO		50	3	11							No	A8C3	TUMOR FREE	NO		YES			NO	YES	X6	Deep	30	Moderate Necrosis (>=10, <50%)		FALSE
TCGA-DX-AB3A-01A		80	426.42.0	Nationwide Children's Hospital			TCGA-DX-AB3A			14		0	-2763	-2763	073E859D-7F47-4FC2-AC42-963714364764	No	YES			YES		Negative	YES			3								Yes	AB3A							NO	YES	DX	Deep		0% (no necrosis or no mention of necrosis)		FALSE
TCGA-3B-A9HY-01A	Complete Response	49	412.44.0	Nationwide Children's Hospital	TCGA-3B-A9HY-F69151	E88FC731-1B30-44CA-8EE4-466C55244002	TCGA-3B-A9HY	NO		14	30	0			EC58204D-9713-47BA-94E5-964CB8335624	No	YES	Conventional leiomyosarcoma	No Major Vessel Involvement	NO	YES	Negative	NO		12	3	12							No	A9HY	TUMOR FREE		NO				NO	YES	3B	Superficial		<10% (focal necrosis)		FALSE
TCGA-DX-AB36-01A		86	426.42.0	Nationwide Children's Hospital			TCGA-DX-AB36			14		0	-3991	-3991	D248F15B-53FF-43FC-9B69-ABBD034D07C8	No	YES			NO		Positive	NO			3								Yes	AB36							NO	YES	DX	Deep		0% (no necrosis or no mention of necrosis)	YES	FALSE
TCGA-MO-A47R-01A	Progressive Disease	75	263.66.0	Nationwide Children's Hospital	TCGA-MO-A47R-F69710	7BC9E417-1A79-4F72-AB3F-86B2605B0B1B	TCGA-MO-A47R			14	16	0			B6DC95D9-72E6-4E9F-8742-54D8034229F8	No	YES	Conventional leiomyosarcoma			NO					3	1							No	A47R	WITH TUMOR	NO	NO	NO			YES	NO	MO					FALSE
TCGA-K1-A42W-01A	Progressive Disease	65	263.66.0	Nationwide Children's Hospital	TCGA-K1-A42W-F69525	2CFACBD2-C3A8-49DD-8645-386C13E51C88	TCGA-K1-A42W			14	13	0			13434B36-2C2D-4E66-9A1B-B2EC812C1549	No	YES	Conventional leiomyosarcoma	No Major Vessel Involvement		NO	Negative				3	1							No	A42W	WITH TUMOR	NO	NO	NO			YES	NO	K1					FALSE
TCGA-DX-A3LY-01B	Complete Response	66	290.65.0	Nationwide Children's Hospital	TCGA-DX-A3LY-F42898	43918541-DE13-497D-A66A-DB0A4CEFF3FC	TCGA-DX-A3LY			14	2	0			A2C88955-0E9C-4804-A268-C6473FD59996	No	YES				NO	Negative				3	5							No	A3LY	TUMOR FREE	NO		NO			NO	YES	DX	Deep			NO	FALSE
TCGA-WP-A9GB-01A	Progressive Disease	59	383.48.0	Nationwide Children's Hospital	TCGA-WP-A9GB-F65380	1411F347-FA47-419D-B435-B90BD43E1280	TCGA-WP-A9GB			14	22	0			98897353-7740-4289-8C10-1C75A13B35FC	No	YES	Conventional leiomyosarcoma	No Major Vessel Involvement		NO	Negative			40	3	9							No	A9GB	WITH TUMOR	NO	NO	NO			NO	YES	WP			<10% (focal necrosis)		FALSE
TCGA-DX-A8BM-01A	Complete Response	60	426.42.0	Nationwide Children's Hospital	TCGA-DX-A8BM-F70339	DE02F92B-3A05-405A-AC2A-055106FD9F74	TCGA-DX-A8BM			14	5	0			C9947F95-7AA4-43A4-92F9-6CD182AC144B	No	YES			NO	NO	Negative	NO			3	2							No	A8BM	TUMOR FREE	NO		YES			NO	YES	DX	Deep	60	Extensive Necrosis (>50%)		FALSE
TCGA-KD-A5QU-01A	Progressive Disease	41	290.65.0	Nationwide Children's Hospital	TCGA-KD-A5QU-F72524	2D671ACC-9CC6-4BFA-AE53-38813AD4EEBF	TCGA-KD-A5QU	NO		14	13	0			A33C401D-47E4-44E4-AD25-F1501723441E	No	YES	Poorly differentiated or pleomorphic or epithelioid leiomyosarcoma			NO	Negative			28	3	7							No	A5QU	WITH TUMOR	YES	YES	NO			NO	YES	KD			Moderate Necrosis (>=10, <50%)		FALSE
TCGA-DX-A3UB-01A	Complete Response	54	310.63.0	Nationwide Children's Hospital	TCGA-DX-A3UB-F42866	2D7008E9-B840-4942-AAC3-D1997C045CDF	TCGA-DX-A3UB			14	2	0			AD6DBFA1-D5AE-4908-B36B-4529444EE340	No	YES	Conventional leiomyosarcoma	No Major Vessel Involvement		NO	Negative			3	3	5							No	A3UB	TUMOR FREE	NO	NO	NO			NO	YES	DX	Deep				FALSE
TCGA-KD-A5QS-01A	Progressive Disease	55	290.65.0	Nationwide Children's Hospital	TCGA-KD-A5QS-F72522	EBDC7F34-AED4-4FBA-8B44-3F9F2C54B503	TCGA-KD-A5QS			14	13	0			BCB76614-134F-4241-8DD4-CC8840177AB3	No	YES	Poorly differentiated or pleomorphic or epithelioid leiomyosarcoma		NO	NO		YES		61	3	7							No	A5QS	WITH TUMOR	YES	YES	NO			NO	YES	KD			Extensive Necrosis (>50%)		FALSE
TCGA-FX-A3TO-01A	Complete Response	87	229.66.0	Nationwide Children's Hospital	TCGA-FX-A3TO-F57849	4753D7BD-BBCD-40AF-AF6E-96DB2EBBCFBF	TCGA-FX-A3TO			14	27	0			4A6456EA-8165-43B0-BF25-614F5C1EDF1D	No	YES				NO	Positive				3	3							No	A3TO	TUMOR FREE	NO		NO			YES	NO	FX	Deep				FALSE
TCGA-IF-A4AK-01A	Complete Response	82	263.66.0	Nationwide Children's Hospital	TCGA-IF-A4AK-F58361	0ACE67C4-B7AB-4B3F-B986-3989A0A86682	TCGA-IF-A4AK	NO		14	19	0			2AB59CF0-41B3-4A2F-9647-DDD331F42A2E	No	YES	Conventional leiomyosarcoma	No Major Vessel Involvement	NO	NO	Negative	NO			3	9							Yes	A4AK	TUMOR FREE	NO	NO	YES			NO	YES	IF	Deep		0% (no necrosis or no mention of necrosis)		FALSE
TCGA-UE-A6QT-01A	Complete Response	50	336.56.0	Nationwide Children's Hospital	TCGA-UE-A6QT-F58867	D58F1753-5EC8-489D-890F-C7204B24534C	TCGA-UE-A6QT	NO		14	25	0			B31500D9-DF9A-449B-BDDE-6B2CDD89C262	No	YES			NO	NO	Negative	NO		30	3	4							No	A6QT	TUMOR FREE	NO					YES	NO	UE	Deep	0	0% (no necrosis or no mention of necrosis)	NO	FALSE
TCGA-DX-AB2T-01A	Complete Response	54	396.46.0	Nationwide Children's Hospital	TCGA-DX-AB2T-F72173	D2011BED-219B-41BD-A904-910CC278F6C4	TCGA-DX-AB2T			14	22	0			6BAE4F6D-6B55-46F6-B6DD-1120FE0F9082	No	YES			NO	NO	Negative	YES			3	4							No	AB2T	TUMOR FREE	NO		NO			NO	YES	DX	Deep		0% (no necrosis or no mention of necrosis)		FALSE
TCGA-KD-A5QT-01A		69	290.65.0	Nationwide Children's Hospital	TCGA-KD-A5QT-F72523	8D1EEDA4-83FA-4275-8EF8-A027F11A9D5C	TCGA-KD-A5QT			14	13	0			434E8EB7-1A76-484C-BA0D-23B2A8EC8E97	No	YES	Conventional leiomyosarcoma	No Major Vessel Involvement		YES	Negative			102	3	7							No	A5QT			YES				NO	YES	KD					FALSE
TCGA-3B-A9HZ-01A	Progressive Disease	66	412.44.0	Nationwide Children's Hospital	TCGA-3B-A9HZ-F69279	38CD1C58-74DF-4604-B16C-0B5CE7FDC9D5	TCGA-3B-A9HZ	NO		14	31	0			EF0F41CD-8BCF-4702-AAE4-7DE493E894E7	No	YES	Poorly differentiated or pleomorphic or epithelioid leiomyosarcoma	No Major Vessel Involvement	NO	NO	Positive	YES		8	3	12							No	A9HZ	WITH TUMOR	YES	NO	YES			NO	YES	3B		20	Moderate Necrosis (>=10, <50%)		FALSE
TCGA-Z4-A9VC-01A	Complete Response	37	383.48.0	Nationwide Children's Hospital	TCGA-Z4-A9VC-F69051	711DBAD1-798C-4791-90B3-802220BEDB69	TCGA-Z4-A9VC			14	24	0			9AB56E89-7F76-493A-92FC-6C58CEBE41F8	No	YES				NO	Negative			26	3	12							No	A9VC	TUMOR FREE	NO		NO			YES	NO	Z4	Deep				FALSE
TCGA-DX-A48L-01A	Progressive Disease	49	310.63.0	Nationwide Children's Hospital	TCGA-DX-A48L-F42888	868E0AE9-905B-478D-B33F-1F6A7FFBBEA1	TCGA-DX-A48L			14	2	0			78A3F3F3-FBF4-4384-95C0-EC2AFC70B7C3	No	YES	Conventional leiomyosarcoma	No Major Vessel Involvement		NO					3	5							No	A48L	WITH TUMOR	NO	NO	YES			NO	YES	DX	Deep				FALSE
TCGA-DX-A8BU-01A		58	383.48.0	Nationwide Children's Hospital			TCGA-DX-A8BU			14		0			A2231699-9880-408A-A88A-9BCF856A20DA	No	YES			NO		Positive	YES			3								No	A8BU							NO	YES	DX	Deep	30	Moderate Necrosis (>=10, <50%)		FALSE
TCGA-X6-A7W8-01A		89	363.51.0	Nationwide Children's Hospital			TCGA-X6-A7W8			14		0			C55CADC7-3C28-4A88-96D3-CE60692FBA91	No	YES			NO		Positive	NO		40	3								No	A7W8							NO	YES	X6	Deep	30	Moderate Necrosis (>=10, <50%)		FALSE
TCGA-WK-A8XT-01A		40	383.48.0	Nationwide Children's Hospital			TCGA-WK-A8XT		Kidney	14		0			5BA7830A-3405-4024-B9B9-4C01BB438339	No	YES			YES		Negative	YES		50	3								Yes	A8XT						FISH for SS18 split	NO	YES	WK	Deep		0% (no necrosis or no mention of necrosis)		FALSE
TCGA-DX-A8BH-01A	Progressive Disease	86	383.48.0	Nationwide Children's Hospital	TCGA-DX-A8BH-F65156	0A4DA41E-DA98-42B0-8747-5CF700312CCD	TCGA-DX-A8BH			14	18	0			637812D0-19EA-4B08-AD31-2E86FBC0C7D3	No	YES			NO	NO	Positive	NO			3	9							Yes	A8BH	WITH TUMOR	NO		NO			YES	NO	DX	Deep	10	<10% (focal necrosis)		FALSE
TCGA-IW-A3M5-01A	Partial Response	76	218.68.0	Nationwide Children's Hospital	TCGA-IW-A3M5-F29479	31DB185D-6D7E-4672-83CB-C96D2CABA2CB	TCGA-IW-A3M5	NO		14	19	0			600ACF44-4B1D-4BA3-BF52-C2F018E891B9	No	YES	Poorly differentiated or pleomorphic or epithelioid leiomyosarcoma	No Major Vessel Involvement	NO		Negative	YES		20	3	3							No	A3M5	WITH TUMOR	YES	YES	NO			NO	YES	IW		9	<10% (focal necrosis)	NO	FALSE
TCGA-3B-A9I0-01A	Progressive Disease	33	412.44.0	Nationwide Children's Hospital	TCGA-3B-A9I0-F69281	C5B6AC71-6D38-4D53-A719-B4A9F7398ACC	TCGA-3B-A9I0	NO		14	31	0			A0A69BAB-06AE-44C4-994F-84CE581D3F06	No	YES	Conventional leiomyosarcoma	No Major Vessel Involvement	NO	NO	Negative	YES		6	3	12							No	A9I0	WITH TUMOR	YES	NO	NO			NO	YES	3B		20	Moderate Necrosis (>=10, <50%)		FALSE
TCGA-DX-A6YV-01A		74	363.51.0	Nationwide Children's Hospital			TCGA-DX-A6YV			14		0			C8AD1270-4A60-4F33-B95B-AB14B7B3BD75	No	YES			NO		Negative	YES	Groin - lymph nodes		3								No	A6YV							NO	YES	DX	Deep	35	Moderate Necrosis (>=10, <50%)		FALSE
TCGA-DX-A6B9-01A	Complete Response	45	336.56.0	Nationwide Children's Hospital	TCGA-DX-A6B9-F59636	FD57DD88-E87F-4548-AAB3-FDEDF4D1B600	TCGA-DX-A6B9			14	16	0			244D4027-8F0B-46CF-824E-A1CD76CD2D88	No	YES	Conventional leiomyosarcoma	No Major Vessel Involvement	NO	NO	Negative	NO			3	5							No	A6B9	TUMOR FREE	NO	NO	NO			NO	YES	DX	Deep	0	0% (no necrosis or no mention of necrosis)		FALSE
TCGA-DX-A2J1-01A	Complete Response	53	218.68.0	Nationwide Children's Hospital	TCGA-DX-A2J1-F42840	41286700-DB49-4FDA-93DC-F19105B4F87A	TCGA-DX-A2J1			14	1	0			FC50CB32-8667-4CF1-9842-896AE27C5D8A	No	YES				NO	Positive				3	5							No	A2J1	TUMOR FREE	NO		NO					DX	Deep			NO	FALSE
TCGA-SI-A71P-01A	Complete Response	50	342.56.0	Nationwide Children's Hospital	TCGA-SI-A71P-F61921	54766F97-7E98-4BCE-9454-64470C43A2FD	TCGA-SI-A71P			14	15	0			18D1B24C-06B4-4337-8709-35536BCCF3C0	No	YES			NO	NO		NO			3	7	YES	NF1	Familial	No			No	A71P	TUMOR FREE	YES		YES			NO	YES	SI	Deep		Extensive Necrosis (>50%)		FALSE
TCGA-LI-A9QH-01A	Complete Response	72	383.48.0	Nationwide Children's Hospital	TCGA-LI-A9QH-F69203	F8BC409D-4ADD-41C9-B47B-5D99AE016FB9	TCGA-LI-A9QH			14	30	0			883F71C3-CB21-4043-953F-DBFFF0F6B995	No	YES			NO	NO	Negative	NO		24	3	12							Yes	A9QH	TUMOR FREE	NO		YES			YES	NO	LI	Deep	15	Moderate Necrosis (>=10, <50%)		FALSE
TCGA-RN-A68Q-01A	Complete Response	62	310.63.0	Nationwide Children's Hospital	TCGA-RN-A68Q-F64635	A9D3F0EF-DDD0-4887-B619-8BB039F5C642	TCGA-RN-A68Q			14	19	0			6FA47CF8-DF4A-490B-8AD7-51A4D74518E5	No	YES				YES				3	3	3							No	A68Q	TUMOR FREE	NO		NO			NO	YES	RN		5	<10% (focal necrosis)		FALSE
TCGA-KF-A41W-01A	Complete Response	71	263.66.0	Nationwide Children's Hospital	TCGA-KF-A41W-F41628	2597B48F-0857-4E76-A261-811B0728ACB7	TCGA-KF-A41W			14	22	0			53FB25BB-B8D5-48C3-922E-867DB89339BD	No	YES		No Major Vessel Involvement	NO	NO	Negative	NO			3	3							Yes	A41W	TUMOR FREE	YES	YES	NO			YES	NO	KF					FALSE
TCGA-IF-A4AJ-01A		80	263.66.0	Nationwide Children's Hospital			TCGA-IF-A4AJ	NO		14		0			1E3E9A25-B8A7-4281-B4A3-F9A6D81A60DE	No	YES	Conventional leiomyosarcoma	No Major Vessel Involvement	NO		Negative	YES			3								No	A4AJ			NO				NO	YES	IF	Deep	15	Moderate Necrosis (>=10, <50%)		FALSE
TCGA-DX-AB2O-01A	Complete Response	78	412.44.0	Nationwide Children's Hospital	TCGA-DX-AB2O-F65158	B86E8306-5FBF-4C8E-9A90-40EE1A854FD9	TCGA-DX-AB2O			14	18	0			CB9BD70E-0F01-4473-9B7C-B01A911435DB	No	YES			NO	NO	Negative	NO			3	9							No	AB2O	TUMOR FREE	NO		NO			NO	YES	DX	Superficial	10	<10% (focal necrosis)		FALSE
TCGA-QQ-A8VF-01A	Complete Response	70	383.48.0	Nationwide Children's Hospital	TCGA-QQ-A8VF-F66418	993A057B-4400-44B3-BEAE-69DA06A245D9	TCGA-QQ-A8VF	NO		14	14	0			D187A2FA-3F14-44B9-9608-08FFFCE5CBE9	No	YES	Poorly differentiated or pleomorphic or epithelioid leiomyosarcoma	No Major Vessel Involvement	NO	NO	Negative	NO			3	10							No	A8VF	TUMOR FREE	NO	NO	NO			NO	YES	QQ			Moderate Necrosis (>=10, <50%)	NO	FALSE
TCGA-MJ-A850-01A	Complete Response	28	363.51.0	Nationwide Children's Hospital	TCGA-MJ-A850-F62975	A5DEE15F-2CD8-4BB8-AA6F-EFB639932A9C	TCGA-MJ-A850	NO		14	29	0			31D46CC0-E3A3-4F09-9F96-8D81401F59BE	No	YES				NO		NO			3	7							No	A850	TUMOR FREE	NO		YES			NO	YES	MJ	Deep	10	<10% (focal necrosis)		FALSE
TCGA-WK-A8XQ-01A		57	383.48.0	Nationwide Children's Hospital			TCGA-WK-A8XQ	YES	Other	14		0			F4A8D78C-ACD3-4405-9491-41FBB83FCA17	No	YES			YES		Positive	NO		3	3							Omentum	No	A8XQ							NO	YES	WK	Deep	50	Moderate Necrosis (>=10, <50%)	NO	FALSE
TCGA-WK-A8XO-01A		66	383.48.0	Nationwide Children's Hospital			TCGA-WK-A8XO	YES	Colon	14		0			030E2DCE-9F04-4663-9374-4429A773F38E	No	YES			YES		Negative	NO		40	3								No	A8XO							NO	YES	WK	Deep		0% (no necrosis or no mention of necrosis)	NO	FALSE
TCGA-VT-A80G-01A	Progressive Disease	66	375.50.0	Nationwide Children's Hospital	TCGA-VT-A80G-F68312	9183F74B-6D09-4AB3-9CD6-7AAED008E24F	TCGA-VT-A80G			14	18	0			1B42466F-2A9C-4BE7-973B-4B24E84D05F5	No	YES			NO	NO	Negative	YES		17	3	3							No	A80G	WITH TUMOR	NO		YES			YES	NO	VT	Deep	10	<10% (focal necrosis)		FALSE
TCGA-DX-A3UD-01A	Complete Response	56	310.63.0	Nationwide Children's Hospital	TCGA-DX-A3UD-F42868	C8650D7C-6998-4E1F-ACC9-C68AD88163E8	TCGA-DX-A3UD			14	2	0			8B0E5C20-B719-4236-8B01-4F9B5EC7C1C8	No	YES	Conventional leiomyosarcoma	Renal vein		NO	Negative			12	3	5							No	A3UD	WITH TUMOR	NO	NO	NO			NO	YES	DX	Deep				FALSE
TCGA-DX-AB3C-01A	Progressive Disease	27	426.42.0	Nationwide Children's Hospital	TCGA-DX-AB3C-F65387	FC6142DA-0234-450D-9C5A-EA933ECE363A	TCGA-DX-AB3C			14	22	0			25F6D531-7918-4C63-89B6-ED5FE01A3A78	No	YES			NO	NO	Positive	YES			3	9							No	AB3C	WITH TUMOR	YES		YES			NO	YES	DX	Deep		Moderate Necrosis (>=10, <50%)		FALSE
TCGA-WK-A8XX-01A		70	383.48.0	Nationwide Children's Hospital			TCGA-WK-A8XX	YES	Kidney	14		0			5F3D62C2-4C8B-4A18-9FC3-67A8A0BF6014	No	YES	Conventional leiomyosarcoma	Renal vein	YES		Negative	YES		22	3								No	A8XX			NO				NO	YES	WK	Deep		<10% (focal necrosis)	NO	FALSE
TCGA-DX-A8BK-01A	Complete Response	61	383.48.0	Nationwide Children's Hospital	TCGA-DX-A8BK-F65614	E0EC454E-1BAC-4411-BE43-24862B3B65F0	TCGA-DX-A8BK			14	25	0			E88FE72E-53AC-4B6F-8512-8989402515A3	No	YES			NO	NO	Negative	NO			3	9							No	A8BK	TUMOR FREE	NO		YES			NO	YES	DX	Deep	75	Extensive Necrosis (>50%)		FALSE
TCGA-DX-A3U6-01A	Complete Response	63	307.63.0	Nationwide Children's Hospital	TCGA-DX-A3U6-F42857	D09CF109-FDF7-49BF-A8DE-D1316042358F	TCGA-DX-A3U6			14	2	0			445C3C2D-232E-4B5A-B9D0-B55A53AABE79	No	YES				NO	Negative				3	5							No	A3U6	WITH TUMOR	NO		NO			NO	YES	DX	Deep			NO	FALSE
TCGA-DX-A7EQ-01A		72	396.46.0	Nationwide Children's Hospital			TCGA-DX-A7EQ			14		0			46D9C692-4CAD-4030-B1FB-DF59FB9AA603	No	YES			NO		Negative	YES		15	3								No	A7EQ							NO	YES	DX	Deep	5	<10% (focal necrosis)		FALSE
TCGA-DX-A1KY-01A	Progressive Disease	66	263.66.0	Nationwide Children's Hospital	TCGA-DX-A1KY-F42873	6B1A2D86-02A1-40A4-8188-1C27992C0331	TCGA-DX-A1KY			14	2	0			4F95345D-F5DD-45CC-B5F0-47159EA5E0D1	No	YES				NO					3	5							No	A1KY	WITH TUMOR	NO		NO					DX	Deep				FALSE
TCGA-MB-A5Y8-01A	Complete Response	60	307.63.0	Nationwide Children's Hospital	TCGA-MB-A5Y8-F67117	77F443F5-2F1B-4AB5-92B1-6E65F0C97948	TCGA-MB-A5Y8			14	29	0			E4FCF2E5-C331-46FF-8CF8-E0D8443E6D61	No	YES				NO	Negative				3	12							No	A5Y8	TUMOR FREE	YES		YES			YES	NO	MB		0	0% (no necrosis or no mention of necrosis)		FALSE
TCGA-Z4-A8JB-01A	Complete Response	24	383.48.0	Nationwide Children's Hospital	TCGA-Z4-A8JB-F69050	1A9D8E13-CB24-478F-90AA-04E5960952D3	TCGA-Z4-A8JB			14	24	0			8281A71D-7D60-4B1C-ACB0-4F23C42DBE8E	No	YES				NO	Negative				3	12							No	A8JB	TUMOR FREE	NO		NO			YES	NO	Z4	Deep				FALSE
TCGA-SI-AA8C-01A	Stable Disease	20	396.46.0	Nationwide Children's Hospital	TCGA-SI-AA8C-F71415	F5D3ACFD-364C-4936-8B7F-6BDFD42D3733	TCGA-SI-AA8C			14	25	0			3EF188A6-79A0-4970-8C31-41636F3A844B	No	YES			NO	NO	Positive	YES			3	3		NF1	Sporadic	Yes, Mutations Identified	Heterozygous truncating mutation,		No	AA8C	WITH TUMOR	YES		YES			NO	YES	SI	Deep		Extensive Necrosis (>50%)		FALSE
TCGA-X6-A8C2-01A	Stable Disease	56	375.50.0	Nationwide Children's Hospital	TCGA-X6-A8C2-F67917	A408DEEA-1CAB-44D9-8FDE-B62AED45CBDD	TCGA-X6-A8C2			14	12	0			CB57094B-67DB-42A4-AC20-986EBD54F162	No	YES			NO	NO	Positive	NO			3	11							No	A8C2	WITH TUMOR	YES		YES			NO	YES	X6	Deep	0	0% (no necrosis or no mention of necrosis)		FALSE
TCGA-UE-A6QU-01A	Complete Response	90	336.56.0	Nationwide Children's Hospital	TCGA-UE-A6QU-F58869	C2509321-5A35-4F44-9A31-C4E571A45DB9	TCGA-UE-A6QU	NO		14	25	0			4E60BAA8-54A8-461C-9BB3-51EB9B4350AB	No	YES			NO	NO	Negative	NO		40	3	4							No	A6QU	TUMOR FREE	NO		NO			YES	NO	UE	Deep	0	0% (no necrosis or no mention of necrosis)		FALSE
TCGA-PC-A5DK-01A	Complete Response	63	290.65.0	Nationwide Children's Hospital	TCGA-PC-A5DK-F66360	EC639732-81F6-4D69-8769-33E24D8957B1	TCGA-PC-A5DK			14	13	0			7BE5CFE5-0DD0-4131-AADF-E88574F12F48	No	YES	Well-differentiated leiomyosarcoma (resembling leiomyoma)	Yes, NOS		NO	Negative			1.5	3	10							No	A5DK	TUMOR FREE	NO		NO			NO	YES	PC					FALSE
TCGA-DX-A48R-01A	Progressive Disease	41	310.63.0	Nationwide Children's Hospital	TCGA-DX-A48R-F42894	0526D20B-427C-474D-AB01-F025E9B4D71D	TCGA-DX-A48R			14	2	0			3D3D59FE-AFE3-4A1F-BA8F-4F7D3B94E427	No	YES	Conventional leiomyosarcoma	Pelvic vein,common,external, or iliac		YES	Positive				3	5							No	A48R	WITH TUMOR	NO	NO	NO			NO	YES	DX	Deep				FALSE
TCGA-SG-A6Z4-01A	Stable Disease	47	342.56.0	Nationwide Children's Hospital	TCGA-SG-A6Z4-F68561	A27AC588-7E41-4665-AC95-30D54FFAA312	TCGA-SG-A6Z4			14	26	0			AA7CB3CF-E0D5-4B51-99AE-F887B69E9D29	No	YES			NO	NO	Negative	YES		44	3	11							No	A6Z4	WITH TUMOR	YES		YES			YES	NO	SG	Deep	30	Moderate Necrosis (>=10, <50%)		FALSE
TCGA-IE-A4EK-01A	Complete Response	54	263.66.0	Nationwide Children's Hospital	TCGA-IE-A4EK-F45211	28511FE4-C92C-4454-AE74-4D1C4EA59E3A	TCGA-IE-A4EK			14	10	0			269324EE-2B94-4070-8D6C-0BAEB969A0F3	No	YES	Well-differentiated leiomyosarcoma (resembling leiomyoma)	Renal vein		YES	Positive	NO		3	3	7							No	A4EK			NO				YES	NO	IE			0% (no necrosis or no mention of necrosis)		FALSE
TCGA-DX-A6YZ-01A	Complete Response	59	363.51.0	Nationwide Children's Hospital	TCGA-DX-A6YZ-F59938	9B026BE7-04BD-484A-8E7B-ACD4715F61AC	TCGA-DX-A6YZ			14	23	0			3700F320-5129-42D4-ACDA-5C161E9928DF	No	YES			NO	NO	Negative	NO			3	5							No	A6YZ	TUMOR FREE	NO		YES			NO	YES	DX	Superficial	10	<10% (focal necrosis)		FALSE
TCGA-DX-A1L4-01A	Progressive Disease	60	286.63.0	Nationwide Children's Hospital	TCGA-DX-A1L4-F42883	0B51B300-080C-4001-9076-C6CAF3C81BA2	TCGA-DX-A1L4			14	2	0			8824CD42-D4DA-4289-AAC0-2D8144450571	No	YES				NO					3	5							No	A1L4	WITH TUMOR	NO		NO					DX	Deep				FALSE
TCGA-FX-A48G-01A	Progressive Disease	56	263.66.0	Nationwide Children's Hospital	TCGA-FX-A48G-F64192	913B6DE5-E20F-4C00-BDF4-0731B0277B4F	TCGA-FX-A48G	NO	Other	14	27	0			1C8EE813-8EEF-4D85-A009-0FD12E934877	No	YES	Conventional leiomyosarcoma	No Major Vessel Involvement	NO	NO					3	8						Ovary	No	A48G	WITH TUMOR	YES	YES	NO			YES	NO	FX	Deep		0% (no necrosis or no mention of necrosis)		FALSE
TCGA-DX-A8BZ-01A		78	383.48.0	Nationwide Children's Hospital			TCGA-DX-A8BZ			14		0			61F5C9F8-3787-4A03-B2E9-8DF7EEC29FF2	No	YES	Poorly differentiated or pleomorphic or epithelioid leiomyosarcoma	No Major Vessel Involvement	NO		Positive	YES			3								No	A8BZ			NO				YES	NO	DX	Deep		0% (no necrosis or no mention of necrosis)		FALSE
TCGA-DX-A8BT-01A	Complete Response	63	383.48.0	Nationwide Children's Hospital	TCGA-DX-A8BT-F65629	B7865D72-D8B3-45B4-B5B7-4A7C30DBB138	TCGA-DX-A8BT			14	25	0			75B1FCFB-BB01-45FF-A2B7-788B04D4859C	No	YES			YES	NO	Positive	NO			3	9							No	A8BT	TUMOR FREE	NO		YES			NO	YES	DX	Deep		0% (no necrosis or no mention of necrosis)		FALSE
TCGA-SI-AA8B-01A	Stable Disease	80	396.46.0	Nationwide Children's Hospital	TCGA-SI-AA8B-F68522	4689BA62-2232-49B8-A513-B85CA203B3C1	TCGA-SI-AA8B			14	24	0			C46BE2A1-DF9E-4D6B-B157-08FF0AAB9BAC	No	YES			NO	NO	Positive	NO			3	11							No	AA8B	WITH TUMOR	NO		NO			NO	YES	SI	Deep		<10% (focal necrosis)		FALSE
TCGA-DX-AB2V-01A	Complete Response	81	426.42.0	Nationwide Children's Hospital	TCGA-DX-AB2V-F72167	5B0F06D0-246C-48A9-89D2-DD7327509D26	TCGA-DX-AB2V			14	22	0			97CB8888-D270-49B9-8B62-047E8903F90B	No	YES			NO	NO	Negative	NO			3	4							No	AB2V	TUMOR FREE	NO		YES			NO	YES	DX	Superficial		0% (no necrosis or no mention of necrosis)		FALSE
TCGA-DX-A8BJ-01A		76	426.42.0	Nationwide Children's Hospital			TCGA-DX-A8BJ			14		0			3E5D260E-A1F4-4644-A2A8-E8B012D798E3	No	YES			NO		Negative	NO			3								No	A8BJ							NO	YES	DX	Deep		0% (no necrosis or no mention of necrosis)		FALSE
TCGA-VT-A80J-02A	Stable Disease	49	375.50.0	Nationwide Children's Hospital	TCGA-VT-A80J-F68113	5C377325-791C-456A-AB20-634904059597	TCGA-VT-A80J			14	18	0			5CD21788-E04F-4EF5-A803-626D17A8D036	No	YES			NO	NO	Negative	YES	inguinal lymph node	41	3	3							Yes	A80J	TUMOR FREE	YES		NO			YES	NO	VT	Deep	45	Moderate Necrosis (>=10, <50%)		FALSE
TCGA-DX-A3M1-01A	Stable Disease	79	229.66.0	Nationwide Children's Hospital	TCGA-DX-A3M1-F42853	820E6356-21D2-411E-98F2-93E232C8750E	TCGA-DX-A3M1			14	2	0			BB787072-C527-4E0F-9E37-508D3B934CC7	No	YES				NO	Positive				3	5							No	A3M1	WITH TUMOR	NO		NO			NO	YES	DX	Deep			NO	FALSE
TCGA-X6-A7WA-01A	Complete Response	90	363.51.0	Nationwide Children's Hospital	TCGA-X6-A7WA-F63532	7F962D26-CE50-4CFA-ADDD-68A000486288	TCGA-X6-A7WA			14	11	0			E39A31A6-9EA9-4A19-AF8B-FDF1E2CD7CC8	No	YES	Conventional leiomyosarcoma	No Major Vessel Involvement	NO	NO	Positive	NO			3	11							No	A7WA	TUMOR FREE	NO	NO	NO			NO	YES	X6	Deep	10	Moderate Necrosis (>=10, <50%)		FALSE
TCGA-FX-A8OO-01A	Complete Response	31	375.50.0	Nationwide Children's Hospital	TCGA-FX-A8OO-F72527	0A430BF8-B4FA-4144-8915-3976CF78F2DD	TCGA-FX-A8OO			14	10	0			4483D69E-A7AF-47C8-8893-3C983B577C19	No	YES			NO	NO	Negative	NO		31	3	7							No	A8OO	TUMOR FREE	YES		NO		FISH for SS18 split	YES	NO	FX	Deep	10	Moderate Necrosis (>=10, <50%)		FALSE
TCGA-MJ-A68J-01A	Complete Response	55	310.63.0	Nationwide Children's Hospital	TCGA-MJ-A68J-F58617	EF3011D5-8E10-44F0-9134-0FEC0E224CB1	TCGA-MJ-A68J			14	17	0			6ACCD17F-0B9E-4292-B704-6925C2FE28B9	No	YES				YES	Positive				3	4							No	A68J		NO		YES			NO	YES	MJ	Deep				FALSE
TCGA-DX-A3M2-01A	Complete Response	59	229.66.0	Nationwide Children's Hospital	TCGA-DX-A3M2-F42854	C83A7BEA-D1F4-48EE-82B6-7CAAC443B6AD	TCGA-DX-A3M2			14	2	0			A75AEA18-4CD8-4C75-AD04-C615CC625FEF	No	YES				NO	Positive				3	5							Yes	A3M2	WITH TUMOR	NO		NO			NO	YES	DX	Deep			NO	FALSE
TCGA-DX-A6YT-01A	Complete Response	31	363.51.0	Nationwide Children's Hospital	TCGA-DX-A6YT-F65609	CF1AE3DE-58CF-4275-8220-3EF1AC58E150	TCGA-DX-A6YT			14	25	0			78AA3DE2-5198-463B-BC59-39B5599A4F2A	No	YES			NO	NO	Negative	NO			3	9							Yes	A6YT	TUMOR FREE	NO		NO			NO	YES	DX	Superficial		0% (no necrosis or no mention of necrosis)		FALSE
TCGA-DX-A23Y-01A	Progressive Disease	80	290.65.0	Nationwide Children's Hospital	TCGA-DX-A23Y-F42823	67CA62DF-D51E-4D6D-A828-55CE62BFE64A	TCGA-DX-A23Y			14	1	0			93C5E8A8-DFCF-4F2D-8F32-6B3717A438F3	No	YES				NO					3	5							No	A23Y	WITH TUMOR	NO		NO					DX	Deep				FALSE
TCGA-DX-A3UC-01A	Complete Response	37	310.63.0	Nationwide Children's Hospital	TCGA-DX-A3UC-F42867	FA435CF3-AB09-41E9-AB77-CDF5A85E8EA2	TCGA-DX-A3UC			14	2	0			3B5BA278-5D5A-47E9-8677-87B30B6929A7	No	YES	Conventional leiomyosarcoma	Inferior vena cava		NO	Negative				3	5							No	A3UC	WITH TUMOR	NO	NO	NO			NO	YES	DX	Deep				FALSE
TCGA-DX-A8BP-01A		85	383.48.0	Nationwide Children's Hospital	TCGA-DX-A8BP-F65625	926731C9-C28A-4B4A-A4EB-ACA6EFD38777	TCGA-DX-A8BP			14	25	0			1E883CEA-6457-4831-9112-B798995CB309	No	YES			NO	YES	Positive	YES		14	3	9							Yes	A8BP							NO	YES	DX	Deep		0% (no necrosis or no mention of necrosis)		FALSE
TCGA-3B-A9HX-01A	Complete Response	70	412.44.0	Nationwide Children's Hospital	TCGA-3B-A9HX-F69278	75B297D5-77D5-41C2-85FD-2C3951A4F757	TCGA-3B-A9HX	NO		14	31	0			262AC531-CC6B-43DF-B298-D257548661C8	No	YES	Poorly differentiated or pleomorphic or epithelioid leiomyosarcoma	No Major Vessel Involvement	NO	NO	Negative	NO		3	3	12							No	A9HX	TUMOR FREE	NO	NO	NO			NO	YES	3B		49	Moderate Necrosis (>=10, <50%)		FALSE
TCGA-DX-A3UA-01A	Complete Response	47	310.63.0	Nationwide Children's Hospital	TCGA-DX-A3UA-F42864	198BEB05-816E-48C5-A5E9-271BFCA71BB1	TCGA-DX-A3UA			14	2	0			294B1B09-D9A6-4A90-9C87-0E6E32559C9C	No	YES	Conventional leiomyosarcoma	No Major Vessel Involvement		NO					3	5							No	A3UA		NO	NO	NO			NO	YES	DX	Deep				FALSE
TCGA-K1-A3PO-11A	Complete Response	42	218.68.0	Nationwide Children's Hospital	TCGA-K1-A3PO-F49556	DB210A26-6A9C-4E43-801A-0F01353345AE	TCGA-K1-A3PO			14	3	0			AAF75833-A503-460A-9E40-360D42988CBD	No	YES	Conventional leiomyosarcoma	No Major Vessel Involvement	NO	NO	Negative	NO			3	10							No	A3PO	TUMOR FREE	NO	NO	NO			YES	NO	K1	Deep		0% (no necrosis or no mention of necrosis)		FALSE
TCGA-WK-A8XZ-01A		56	383.48.0	Nationwide Children's Hospital			TCGA-WK-A8XZ	NO	Kidney	14		0			BCB74266-96BD-4DD3-880E-D767B95A08A3	No	YES	Conventional leiomyosarcoma	Inferior vena cava	YES		Negative	YES		39	3								No	A8XZ			NO				NO	YES	WK	Deep	10	Moderate Necrosis (>=10, <50%)		FALSE
TCGA-WK-A8XS-01A	Complete Response	58	383.48.0	Nationwide Children's Hospital	TCGA-WK-A8XS-F62607	6AF15B5E-8993-49DB-BDDC-6AADF3C8B391	TCGA-WK-A8XS	YES	Other	14	29	0			3C27A966-9645-4B81-B580-AEE85683A6FE	No	YES	Conventional leiomyosarcoma	No Major Vessel Involvement	NO	NO	Negative	NO		21	3	7						spleen	No	A8XS	TUMOR FREE	NO	NO	NO			NO	YES	WK	Deep		0% (no necrosis or no mention of necrosis)		FALSE
TCGA-PC-A5DM-01A		73	290.65.0	Nationwide Children's Hospital			TCGA-PC-A5DM			14		0			02464D20-CD57-42DF-93F2-CF392A6687E1	No	YES	Poorly differentiated or pleomorphic or epithelioid leiomyosarcoma				Positive				3								Yes	A5DM			NO				NO	YES	PC					FALSE
TCGA-DX-AB2X-01A		73	396.46.0	Nationwide Children's Hospital			TCGA-DX-AB2X			14		0			552DA481-91F8-4C52-A627-639946B786D9	No	YES			YES		Negative	YES			3								Yes	AB2X							NO	YES	DX	Deep	20	Moderate Necrosis (>=10, <50%)		FALSE
TCGA-DX-A48J-01A	Progressive Disease	44	310.63.0	Nationwide Children's Hospital	TCGA-DX-A48J-F42885	F0C49BB3-B36C-4294-A8FD-65CA3E76CDAF	TCGA-DX-A48J			14	2	0			C220D2D4-BF49-4302-A83B-5C2745D7E75F	No	YES	Conventional leiomyosarcoma	No Major Vessel Involvement		NO					3	5							No	A48J	WITH TUMOR	NO	NO	NO			NO	YES	DX	Deep				FALSE
TCGA-3R-A8YX-01A		66	383.48.0	Nationwide Children's Hospital			TCGA-3R-A8YX	YES	Liver	14		0			D64F8B9F-0935-40C3-B6D5-74E77F338D85	No	YES			NO		Positive	YES			3								No	A8YX							YES	NO	3R			0% (no necrosis or no mention of necrosis)	NO	FALSE
TCGA-3B-A9HT-01A	Complete Response	53	412.44.0	Nationwide Children's Hospital	TCGA-3B-A9HT-F69277	2330FD76-5B72-4224-967E-83578D3940A0	TCGA-3B-A9HT	NO		14	31	0			7084992A-BA3A-4980-B0D5-042F931EEF4F	No	YES	Conventional leiomyosarcoma	No Major Vessel Involvement	NO	NO	Negative	NO			3	12							No	A9HT	TUMOR FREE	YES	NO	YES			NO	YES	3B			0% (no necrosis or no mention of necrosis)		FALSE
TCGA-JV-A5VF-01A		69	307.63.0	Nationwide Children's Hospital			TCGA-JV-A5VF	YES	Other	14		0			89258DAA-BC8F-4714-9538-1BDB6A2ED5EA	No	YES	Poorly differentiated or pleomorphic or epithelioid leiomyosarcoma	No Major Vessel Involvement	NO		Positive	YES	OMENTUM	56	3							OMENTUM	No	A5VF			YES				YES	NO	JV	Deep	33	Moderate Necrosis (>=10, <50%)		FALSE
TCGA-HB-A3YV-01A		75	263.66.0	Nationwide Children's Hospital			TCGA-HB-A3YV	YES	Adrenal gland	14		0			99E16BD7-C882-4988-B8A5-145045C36266	No	YES			NO		Positive	NO		21	3								No	A3YV							YES	NO	HB	Deep		Moderate Necrosis (>=10, <50%)		FALSE
TCGA-HS-A5N9-01A	Complete Response	58	286.63.0	Nationwide Children's Hospital	TCGA-HS-A5N9-F71168	7A82500C-9A09-42D4-B841-FE58A2A21001	TCGA-HS-A5N9	NO		14	19	0			8693F71F-F3A2-49DD-884B-532F7DF74229	No	YES	Poorly differentiated or pleomorphic or epithelioid leiomyosarcoma		NO		Negative	NO		39	3	3							Yes	A5N9	TUMOR FREE	YES	YES	NO			NO	YES	HS	Deep	50	Extensive Necrosis (>50%)		FALSE
TCGA-WK-A8Y0-01A		49	426.42.0	Nationwide Children's Hospital			TCGA-WK-A8Y0	NO	Other	14		0			A268153F-53B5-47A4-BD32-987F67FE98A7	No	YES			YES		Negative	YES		25	3							Lung	No	A8Y0							NO	YES	WK	Deep	10	<10% (focal necrosis)		FALSE
TCGA-DX-AB2S-01A	Complete Response	53	412.44.0	Nationwide Children's Hospital	TCGA-DX-AB2S-F65591	165E995E-F1AF-4AC3-B052-E0BF7F72090B	TCGA-DX-AB2S			14	25	0			87C19AB1-39E5-4E05-BB99-3CDDCA9C42D7	No	YES			NO	YES	Negative	NO			3	9							No	AB2S	TUMOR FREE	NO		YES			NO	YES	DX	Deep		0% (no necrosis or no mention of necrosis)		FALSE
TCGA-DX-AB2L-01A	Complete Response	35	426.42.0	Nationwide Children's Hospital	TCGA-DX-AB2L-F65634	CA103478-B829-48AC-A9A2-49D34843C06A	TCGA-DX-AB2L			14	25	0			66CE0D08-C36D-42E3-A736-39C488951C57	No	YES			NO	NO	Positive	NO			3	9							No	AB2L	TUMOR FREE	NO		NO			NO	YES	DX	Deep		0% (no necrosis or no mention of necrosis)		FALSE
TCGA-MB-A5YA-01A	Complete Response	63	307.63.0	Nationwide Children's Hospital	TCGA-MB-A5YA-F60270	FE8B04E8-F728-4F9D-85C2-2B35F2047F8F	TCGA-MB-A5YA	NO	Colon	14	31	0			D48BC297-4139-4878-B86B-FC2DD9286F1A	No	YES	Poorly differentiated or pleomorphic or epithelioid leiomyosarcoma	Yes, NOS	NO	YES	Negative				3	12							No	A5YA	TUMOR FREE	NO	NO	NO			YES	NO	MB		0	0% (no necrosis or no mention of necrosis)		FALSE
TCGA-K1-A6RU-01A	Progressive Disease	66	336.56.0	Nationwide Children's Hospital	TCGA-K1-A6RU-F69528	3115BFBD-6889-4334-B4D9-0CB3C7D1637C	TCGA-K1-A6RU			14	13	0			0C59BFE8-52AF-456E-8483-324B485E0FDE	No	YES				NO	Positive			26	3	1							No	A6RU	WITH TUMOR	YES		YES			YES	NO	K1	Deep	20	Moderate Necrosis (>=10, <50%)		FALSE
TCGA-Z4-AAPG-01A	Complete Response	64	412.44.0	Nationwide Children's Hospital	TCGA-Z4-AAPG-F69053	7B94C4FF-D159-4FEF-BCC8-1F097C89F03B	TCGA-Z4-AAPG			14	24	0			0A84EFC4-8561-458A-B34D-D42DAD1ED64D	No	YES				NO	Negative			21	3	12							No	AAPG	TUMOR FREE	NO		NO			YES	NO	Z4	Deep				FALSE
TCGA-3B-A9HP-01A		57	396.46.0	Nationwide Children's Hospital			TCGA-3B-A9HP	NO		14		0			CBE6D25B-277F-47FD-A380-6A4D73D90A36	No	YES	Poorly differentiated or pleomorphic or epithelioid leiomyosarcoma	No Major Vessel Involvement	NO		Positive	YES			3								No	A9HP			NO				NO	YES	3B		25	Moderate Necrosis (>=10, <50%)		FALSE
TCGA-X6-A8C6-01A	Progressive Disease	55	375.50.0	Nationwide Children's Hospital	TCGA-X6-A8C6-F68284	546AEF4F-27A8-4201-BB0D-25A45FCDCBD7	TCGA-X6-A8C6			14	14	0			3F62EECE-6DC2-4C5B-98EF-8499652D9016	No	YES			NO	NO	Positive	NO			3	11							Yes	A8C6	WITH TUMOR	YES		YES			NO	YES	X6	Deep	0	0% (no necrosis or no mention of necrosis)		FALSE
TCGA-IF-A3RQ-01A		70	229.66.0	Nationwide Children's Hospital			TCGA-IF-A3RQ	NO	Kidney	14		0		-3096	65C6239D-5637-4FD8-A2FE-E7258726DB6A	No	YES			YES		Negative	NO			3								No	A3RQ							NO	YES	IF	Deep	5	<10% (focal necrosis)	YES	FALSE
TCGA-QQ-A8VD-01A	Stable Disease	56	412.44.0	Nationwide Children's Hospital	TCGA-QQ-A8VD-F66869	4D115C6D-206A-45B1-9C6A-D80F2F3605BA	TCGA-QQ-A8VD	NO		14	24	0			9A04E258-A806-4AE7-81E9-47953FAE606D	No	YES			YES	NO	Positive				3	10							No	A8VD	WITH TUMOR	NO		NO			NO	YES	QQ			0% (no necrosis or no mention of necrosis)		FALSE
TCGA-DX-A6BH-01A	Progressive Disease	34	310.63.0	Nationwide Children's Hospital	TCGA-DX-A6BH-F59976	0C6DB48E-68DC-458E-A629-3476BBD4668A	TCGA-DX-A6BH			14	27	0			616BBB72-C63A-4BDF-BD9D-7582E7D1BE93	No	YES			NO	NO	Positive	NO			3	5							No	A6BH	WITH TUMOR	NO		NO			NO	YES	DX	Deep		0% (no necrosis or no mention of necrosis)	NO	FALSE
TCGA-DX-AB2W-01A	Complete Response	62	412.44.0	Nationwide Children's Hospital	TCGA-DX-AB2W-F70333	DEBDC450-076D-435B-9986-9990AB72AE4C	TCGA-DX-AB2W			14	5	0			E634924A-B385-43AE-9981-B676AAE226A5	No	YES			NO	NO	Negative	NO			3	2							Yes	AB2W	TUMOR FREE	NO		YES			NO	YES	DX	Deep	15	Moderate Necrosis (>=10, <50%)		FALSE
TCGA-3B-A9HL-01A		67	396.46.0	Nationwide Children's Hospital			TCGA-3B-A9HL	NO		14		0			548A26EE-E7B3-4F5C-83E1-4C5AFE414E83	No	YES			YES		Positive	YES			3								No	A9HL							NO	YES	3B			<10% (focal necrosis)	NO	FALSE
TCGA-DX-A3U5-01A	Complete Response	52	229.66.0	Nationwide Children's Hospital	TCGA-DX-A3U5-F42856	21FB85C3-7F86-486B-9350-D6133A5626D6	TCGA-DX-A3U5			14	2	0			AE5F9D08-C6F2-41EC-9FA1-CDBDE05DC968	No	YES				NO	Positive				3	5							No	A3U5	TUMOR FREE	NO		NO			NO	YES	DX	Deep			NO	FALSE
TCGA-DX-A1KZ-01A	Complete Response	66	263.66.0	Nationwide Children's Hospital	TCGA-DX-A1KZ-F42874	F45F8B70-1F61-4F10-85F2-F84E4132D215	TCGA-DX-A1KZ			14	2	0			E0F46767-A945-4DE5-BF9F-4A75685250FC	No	YES				NO					3	5							No	A1KZ	TUMOR FREE	NO		NO					DX	Deep				FALSE
TCGA-Z4-AAPF-01A	Complete Response	35	412.44.0	Nationwide Children's Hospital	TCGA-Z4-AAPF-F69052	43322474-5D4F-456B-A100-CA15657DA47D	TCGA-Z4-AAPF			14	24	0			C1B71443-AC9E-4D19-A87B-614C4E644335	No	YES				NO	Negative			7	3	12							No	AAPF	TUMOR FREE	NO		NO			YES	NO	Z4	Superficial				FALSE
TCGA-DX-A1L3-01A	Progressive Disease	60	263.66.0	Nationwide Children's Hospital	TCGA-DX-A1L3-F42880	24619B87-C183-4199-8454-C548CFD96BCF	TCGA-DX-A1L3			14	2	0			50161D9E-6266-4273-BE69-F1CDD4A4F347	No	YES				NO					3	5							No	A1L3	WITH TUMOR	NO		NO					DX	Deep				FALSE
TCGA-DX-A7EI-01A		78	342.56.0	Nationwide Children's Hospital			TCGA-DX-A7EI			14		0			E63AB6D7-A427-49EA-ABD7-981300D8CE35	No	YES			YES		Positive	NO			3								No	A7EI							NO	YES	DX	Deep		0% (no necrosis or no mention of necrosis)	NO	FALSE
TCGA-IE-A6BZ-01A		65	310.63.0	Nationwide Children's Hospital	TCGA-IE-A6BZ-F62061	08C753DF-5B0E-4963-8A40-1E5B6CE74DD9	TCGA-IE-A6BZ	NO		14	11	0			2E076F68-AEC6-4532-AAF4-C5DC81C7F7A9	No	YES			NO	NO	Negative	NO		5	3	7							No	A6BZ		YES		NO			YES	NO	IE	Deep	30	Moderate Necrosis (>=10, <50%)		FALSE
TCGA-DX-A6B7-01A	Complete Response	55	310.63.0	Nationwide Children's Hospital	TCGA-DX-A6B7-F65155	00172A02-C623-45F7-B8D0-00E47B9EFB0D	TCGA-DX-A6B7			14	25	0			791B49D7-EE73-4374-A394-E207849919C4	No	YES	Conventional leiomyosarcoma	No Major Vessel Involvement	NO	NO	Negative	NO			3	9							No	A6B7	TUMOR FREE	YES	NO	NO			NO	YES	DX	Deep	20	Moderate Necrosis (>=10, <50%)		FALSE
TCGA-LI-A67I-01A	Complete Response	75	310.63.0	Nationwide Children's Hospital	TCGA-LI-A67I-F58448	7C36146D-E22F-4B97-AD5E-65CCABA547C0	TCGA-LI-A67I			14	10	0			47D043D8-7521-4C8A-9BBB-92B61CD6D589	No	YES			NO	NO	Positive	NO		10	3	4							No	A67I	TUMOR FREE	NO		YES			YES	NO	LI	Deep	15	Moderate Necrosis (>=10, <50%)		FALSE
TCGA-FX-A3RE-01A	Complete Response	65	229.66.0	Nationwide Children's Hospital	TCGA-FX-A3RE-F66008	CE2D1798-DD70-46EB-8F9D-C7B22A9DE98B	TCGA-FX-A3RE			14	1	0			42A644C1-7EC2-456A-9361-DA5F8272A70B	No	YES	Poorly differentiated or pleomorphic or epithelioid leiomyosarcoma		NO	NO		NO			3	10							No	A3RE	TUMOR FREE	YES	NO	NO			YES	NO	FX					FALSE
TCGA-FX-A3NJ-01A	Complete Response	54	218.68.0	Nationwide Children's Hospital	TCGA-FX-A3NJ-F72525	7EBC918C-DF29-4B82-A5A0-1442060A8249	TCGA-FX-A3NJ			14	10	0			63710901-D8EB-4EF5-8EF6-2F9ABB005256	No	YES	Conventional leiomyosarcoma	No Major Vessel Involvement		NO	Negative			5	3	7							No	A3NJ	TUMOR FREE		NO				YES	NO	FX	Deep		0% (no necrosis or no mention of necrosis)		FALSE
TCGA-JV-A5VE-01A	Complete Response	60	307.63.0	Nationwide Children's Hospital	TCGA-JV-A5VE-F58251	BDDA1A45-DF54-4B6E-9C5A-15E4B75B54C1	TCGA-JV-A5VE	YES	Other	14	10	0			522D01D6-BFDB-45CA-83DA-F6F1E5ACC09C	No	YES	Poorly differentiated or pleomorphic or epithelioid leiomyosarcoma	No Major Vessel Involvement	NO	NO	Negative	NO		16	3	4						APPENDIX	No	A5VE	TUMOR FREE	YES	YES	NO			YES	NO	JV	Deep	15	Moderate Necrosis (>=10, <50%)		FALSE
TCGA-MB-A8JK-01A	Complete Response	49	375.50.0	Nationwide Children's Hospital	TCGA-MB-A8JK-F69296	D7CA40FC-5C37-4E39-87E8-431AD16A03F5	TCGA-MB-A8JK			14	31	0			F94C0F69-CB95-4624-A94A-CCBB46DB57F2	No	YES			NO	NO	Negative	NO		20	3	12	NO	No		No			No	A8JK	TUMOR FREE	NO		YES			YES	NO	MB	Deep	5	<10% (focal necrosis)	NO	FALSE
TCGA-3B-A9HO-01A	Complete Response	75	396.46.0	Nationwide Children's Hospital	TCGA-3B-A9HO-F69263	A4F58B87-48F8-4479-AF2F-EFE90528FFDF	TCGA-3B-A9HO	NO		14	31	0			2AF6E2AA-D375-4091-812B-B82337F23C8F	Yes	YES			NO	NO	Positive	NO			3	12							Yes	A9HO	TUMOR FREE	NO		NO			NO	YES	3B				NO	FALSE
TCGA-DX-A1KX-01A	Complete Response	67	263.66.0	Nationwide Children's Hospital	TCGA-DX-A1KX-F42872	5EF69E9C-2C00-4EC1-9843-6CFFCAC28312	TCGA-DX-A1KX			14	2	0			9E876740-6C2E-49A8-9AC4-33FB05E4BAD7	No	YES				NO					3	5							No	A1KX	TUMOR FREE	NO		NO					DX	Deep				FALSE
TCGA-DX-A8BO-01A	Complete Response	67	426.42.0	Nationwide Children's Hospital	TCGA-DX-A8BO-F70340	97EDCADA-60AF-4888-9166-64701780B235	TCGA-DX-A8BO			14	5	0			88BE1411-AAC6-41D2-9FAD-28858E961973	No	YES			YES	NO	Positive	NO			3	2							No	A8BO	TUMOR FREE	NO		NO			NO	YES	DX	Deep	15	Moderate Necrosis (>=10, <50%)		FALSE
TCGA-DX-A7EL-01A	Complete Response	56	375.50.0	Nationwide Children's Hospital	TCGA-DX-A7EL-F65611	C35DC1CA-27FD-44CA-BF0C-AADB7CFE1B72	TCGA-DX-A7EL			14	25	0			E1C95DEE-CD3A-46C8-80A7-932E2A9920D7	No	YES	Conventional leiomyosarcoma	Inferior vena cava	NO	NO	Positive	YES			3	9							Yes	A7EL	TUMOR FREE	NO	NO	NO			NO	YES	DX	Deep		0% (no necrosis or no mention of necrosis)		FALSE
TCGA-MB-A8JL-01A	Complete Response	53	375.50.0	Nationwide Children's Hospital	TCGA-MB-A8JL-F69805	946AF229-2C9B-4B22-A63B-5ED6D56DA889	TCGA-MB-A8JL	NO		14	20	0			B2E96B38-ABC3-4B19-97D0-F2360D2601EA	No	YES	Conventional leiomyosarcoma	No Major Vessel Involvement	NO	NO	Negative	NO			3	1							No	A8JL	TUMOR FREE	NO	NO	NO			YES	NO	MB	Superficial	5	<10% (focal necrosis)		FALSE
TCGA-3B-A9HS-01A		60	412.44.0	Nationwide Children's Hospital			TCGA-3B-A9HS			14		0			F96615E5-6336-4ECC-807D-84DC83AEA135	No	YES	Poorly differentiated or pleomorphic or epithelioid leiomyosarcoma	No Major Vessel Involvement	YES		Negative	YES	Pelvis & Arm		3								No	A9HS			NO				NO	YES	3B		30	Moderate Necrosis (>=10, <50%)		FALSE
TCGA-X6-A7WD-01A	Progressive Disease	63	363.51.0	Nationwide Children's Hospital	TCGA-X6-A7WD-F63527	853B55B4-3226-4747-88C4-4A8F660EAA4B	TCGA-X6-A7WD			14	10	0			CBE09D07-7948-43C2-9A33-BB013E5AC018	No	YES	Conventional leiomyosarcoma	No Major Vessel Involvement	NO	NO	Negative	NO			3	11							No	A7WD	WITH TUMOR	NO	NO	NO			NO	YES	X6	Deep		Moderate Necrosis (>=10, <50%)		FALSE
TCGA-DX-A7EM-01A	Complete Response	61	375.50.0	Nationwide Children's Hospital	TCGA-DX-A7EM-F59939	1A9F7147-0D7A-49A9-9D50-A20618A48FC6	TCGA-DX-A7EM			14	23	0			A4D5C1DF-8092-44CF-8F59-BAD64B5E884E	No	YES	Conventional leiomyosarcoma	No Major Vessel Involvement	NO	NO	Positive	NO			3	5							No	A7EM	TUMOR FREE	NO	NO	NO			NO	YES	DX	Deep		0% (no necrosis or no mention of necrosis)		FALSE
TCGA-DX-AB2Z-01A	Complete Response	87	396.46.0	Nationwide Children's Hospital	TCGA-DX-AB2Z-F68281	F1FE1E75-EFE2-4D9C-BC25-6B20AEAE0163	TCGA-DX-AB2Z			14	14	0			25DA5C5A-3F87-46E1-AB13-F5042C0F99EC	No	YES			NO	NO	Negative	NO			3	11							No	AB2Z	TUMOR FREE	NO		NO			NO	YES	DX	Deep	5	<10% (focal necrosis)		FALSE
TCGA-DX-A3U9-01A	Progressive Disease	84	310.63.0	Nationwide Children's Hospital	TCGA-DX-A3U9-F42863	E7EA6C46-9FCD-423C-B89A-37E60CD0E516	TCGA-DX-A3U9			14	2	0			CE885520-8091-435D-BE6F-3997B188455F	No	YES	Conventional leiomyosarcoma	No Major Vessel Involvement		NO					3	5							No	A3U9	WITH TUMOR	NO	NO	NO			NO	YES	DX	Deep				FALSE
TCGA-IS-A3K7-01A	Complete Response	63	218.68.0	Nationwide Children's Hospital	TCGA-IS-A3K7-F38422	BCB4BB71-059B-4C1A-B651-A935915562A3	TCGA-IS-A3K7			14	14	0			36BA8C7D-6553-4DE7-A421-C759CC083247	No	YES	Poorly differentiated or pleomorphic or epithelioid leiomyosarcoma	No Major Vessel Involvement	NO	NO		YES			3	12							No	A3K7	TUMOR FREE	NO	YES	NO			NO	YES	IS					FALSE
TCGA-DX-A7EO-01A	Complete Response	20	375.50.0	Nationwide Children's Hospital	TCGA-DX-A7EO-F59940	1D027CC6-0914-4795-911B-4295F898E9BA	TCGA-DX-A7EO			14	23	0			E6A0C571-AC71-4528-B4FD-9126E05E7968	No	YES			NO	NO	Negative	NO			3	5							No	A7EO	TUMOR FREE	NO		YES	Positive - SS18-SSX2	RT-PCR	NO	YES	DX	Deep		0% (no necrosis or no mention of necrosis)		FALSE
TCGA-HS-A5N7-01A	Complete Response	67	286.63.0	Nationwide Children's Hospital	TCGA-HS-A5N7-F65016	D63A22EA-D0DD-4F31-9611-13016808E995	TCGA-HS-A5N7	NO	Kidney	14	17	0			00C1C6BD-A79A-4DFF-BC93-9E9CADEA4A14	No	YES	Conventional leiomyosarcoma	No Major Vessel Involvement	NO	NO	Negative	NO			3	9							No	A5N7	TUMOR FREE	NO	NO	YES			NO	YES	HS	Superficial		Moderate Necrosis (>=10, <50%)		FALSE
TCGA-FX-A76Y-01A	Complete Response	49	363.51.0	Nationwide Children's Hospital	TCGA-FX-A76Y-F72526	3ADBC70B-35AC-4C42-9393-6BCB5284754E	TCGA-FX-A76Y			14	10	0			B4C23398-A1B8-4CD2-9976-96E8FB260D04	No	YES	Conventional leiomyosarcoma	No Major Vessel Involvement	NO	NO	Negative	NO			3	7							No	A76Y	TUMOR FREE	NO	YES	NO			YES	NO	FX	Deep		<10% (focal necrosis)		FALSE
TCGA-WK-A8XY-01A		53	383.48.0	Nationwide Children's Hospital			TCGA-WK-A8XY	YES	Colon	14		0			DEA27510-9686-4EC9-B938-D4C2B80F788F	No	YES	Conventional leiomyosarcoma	No Major Vessel Involvement	YES		Positive	YES	Scalp	17	3								No	A8XY			NO				NO	YES	WK	Deep		Extensive Necrosis (>50%)		FALSE
TCGA-QQ-A5VD-01A	Complete Response	52	336.56.0	Nationwide Children's Hospital	TCGA-QQ-A5VD-F61334	8110CAB7-1B98-4931-8C8D-2C66C750FE4D	TCGA-QQ-A5VD			14	27	0			0298A761-F5BF-4720-9E55-C3B685C4332D	No	YES	Conventional leiomyosarcoma	No Major Vessel Involvement	NO	NO	Negative	NO			3	6							No	A5VD	TUMOR FREE	NO	NO	NO			NO	YES	QQ	Superficial		0% (no necrosis or no mention of necrosis)		FALSE
TCGA-X6-A7WC-01A	Progressive Disease	74	363.51.0	Nationwide Children's Hospital	TCGA-X6-A7WC-F67800	E4D1D163-8763-408D-8AFF-F0029257840F	TCGA-X6-A7WC			14	12	0			49F9BD81-8B30-4A01-B251-8DA034F6DC1E	No	YES	Conventional leiomyosarcoma	No Major Vessel Involvement	NO	NO	Negative	NO			3	11							No	A7WC	TUMOR FREE	YES	NO	YES			NO	YES	X6	Deep		<10% (focal necrosis)		FALSE
TCGA-IW-A3M4-01A	Complete Response	48	218.68.0	Nationwide Children's Hospital	TCGA-IW-A3M4-F33539	F07D68EC-6606-4E8F-8747-4C4BDD85B734	TCGA-IW-A3M4			14	5	0			AFED4476-E0F7-474F-949A-52130AE23D82	No	YES	Poorly differentiated or pleomorphic or epithelioid leiomyosarcoma	No Major Vessel Involvement	YES			NO			3	7							No	A3M4	WITH TUMOR	YES	YES	NO			NO	YES	IW	Deep		0% (no necrosis or no mention of necrosis)		FALSE
TCGA-DX-A48K-01A	Complete Response	65	310.63.0	Nationwide Children's Hospital	TCGA-DX-A48K-F42887	D48E7EE5-9853-4AED-8802-EA95E49E11EB	TCGA-DX-A48K			14	2	0			5719CF72-2972-48E1-8B8D-AA8F91A2A014	No	YES	Conventional leiomyosarcoma	No Major Vessel Involvement		NO	Negative			20	3	5							No	A48K	TUMOR FREE	NO	NO	NO			NO	YES	DX	Deep				FALSE
TCGA-3B-A9HV-01A		48	412.44.0	Nationwide Children's Hospital			TCGA-3B-A9HV	NO		14		0			082DAC4C-46FA-41EF-BFFD-73A9E8CD463E	No	YES	Conventional leiomyosarcoma	No Major Vessel Involvement	NO		Negative	YES			3								No	A9HV			YES				NO	YES	3B		15	Moderate Necrosis (>=10, <50%)		FALSE
TCGA-DX-A6BE-01A	Complete Response	77	336.56.0	Nationwide Children's Hospital	TCGA-DX-A6BE-F59638	9AF7B272-090E-492D-ADFB-3C95051C9EDC	TCGA-DX-A6BE			14	16	0			9F0EBF94-D75C-4132-8A23-6AC396F404C3	No	YES			NO	NO	Negative	NO			3	5							No	A6BE	TUMOR FREE	NO		NO			NO	YES	DX	Deep	0	0% (no necrosis or no mention of necrosis)	NO	FALSE
TCGA-DX-AATS-01A		72	426.42.0	Nationwide Children's Hospital			TCGA-DX-AATS			14		0			5B3AFB3A-5A76-457A-92BF-1758856BC7F1	No	YES			NO		Positive	NO			3								No	AATS							NO	YES	DX	Deep	5	<10% (focal necrosis)		FALSE
TCGA-DX-AB2J-01A		71	396.46.0	Nationwide Children's Hospital			TCGA-DX-AB2J			14		0			944B237D-391E-4BC6-B17E-D9035C7831DF	No	YES			NO		Positive	NO			3								Yes	AB2J							NO	YES	DX	Deep	30	Moderate Necrosis (>=10, <50%)		FALSE
TCGA-IS-A3KA-01A	Progressive Disease	73	218.68.0	Nationwide Children's Hospital	TCGA-IS-A3KA-F38424	7B07EB9F-0AE7-40BB-B4F2-B926C8AA9D82	TCGA-IS-A3KA			14	14	0			83EAC722-BB2B-41B2-BFE5-924ADE4C431B	No	YES	Poorly differentiated or pleomorphic or epithelioid leiomyosarcoma	No Major Vessel Involvement	YES	NO		YES	Lung & liver		3	12							No	A3KA	WITH TUMOR	NO	YES	NO			NO	YES	IS					FALSE
TCGA-DX-A3U8-01A	Progressive Disease	43	307.63.0	Nationwide Children's Hospital	TCGA-DX-A3U8-F42862	A1A96807-46F6-42DE-93AB-F88EE1182EFA	TCGA-DX-A3U8			14	2	0			785E2617-DEFD-4E8D-B9F0-E81404CC8673	No	YES	Conventional leiomyosarcoma	No Major Vessel Involvement		NO					3	5							No	A3U8	WITH TUMOR	NO	NO	NO			NO	YES	DX	Deep				FALSE
TCGA-DX-AB30-01A		53	412.44.0	Nationwide Children's Hospital			TCGA-DX-AB30			14		0			BADAC7BF-B50C-44C1-B13E-B3D3F2B0AE7A	No	YES			NO		Negative	YES			3								Yes	AB30							NO	YES	DX	Deep		0% (no necrosis or no mention of necrosis)		FALSE
TCGA-3B-A9HU-01A	Progressive Disease	53	412.44.0	Nationwide Children's Hospital	TCGA-3B-A9HU-F69149	E22F11F5-9EEB-4203-95B1-26A81CD00C25	TCGA-3B-A9HU	NO		14	30	0			EA2F9705-C551-40DA-9E04-A04D5E9796D2	No	YES	Conventional leiomyosarcoma	No Major Vessel Involvement	NO	YES	Negative	YES		6	3	12							No	A9HU	WITH TUMOR		NO				NO	YES	3B		10	Moderate Necrosis (>=10, <50%)		FALSE
TCGA-DX-A6YR-01A	Complete Response	75	363.51.0	Nationwide Children's Hospital	TCGA-DX-A6YR-F65191	C51BE599-4BB7-4C90-878E-90399F3AE5A8	TCGA-DX-A6YR			14	19	0			818D6DBF-8A20-411F-B24B-87C6CE34FC47	No	YES			NO	NO	Negative	NO		12	3	9							No	A6YR	TUMOR FREE	NO		YES			NO	YES	DX	Deep		0% (no necrosis or no mention of necrosis)		FALSE
TCGA-QQ-A8VH-01A		31	383.48.0	Nationwide Children's Hospital			TCGA-QQ-A8VH	NO		14		0			980B8A6B-AC21-4C65-9567-F1791D86FB3C	No	YES			YES		Positive	NO			3		YES	NF1	Sporadic				No	A8VH							NO	YES	QQ			0% (no necrosis or no mention of necrosis)		FALSE
TCGA-DX-A1KU-01A	Progressive Disease	82	263.66.0	Nationwide Children's Hospital	TCGA-DX-A1KU-F21741	A98D6802-95B7-479F-BDE5-7DECA2CEAD36	TCGA-DX-A1KU			14	2	0			4293ED02-4478-4170-A25B-BBAB895BA125	No	YES									3	5							No	A1KU	WITH TUMOR	NO		NO			NO	YES	DX	Deep				FALSE
TCGA-HS-A5N8-01A	Partial Response	69	286.63.0	Nationwide Children's Hospital	TCGA-HS-A5N8-F64989	BE4AF008-1A6F-4CF7-9781-D29D75F50E47	TCGA-HS-A5N8			14	17	0			238D42FC-B6A9-4DD0-8A71-E0C20B5555A2	No	YES	Poorly differentiated or pleomorphic or epithelioid leiomyosarcoma			NO				30	3	9							No	A5N8		NO	YES	NO			NO	YES	HS	Deep				FALSE
TCGA-DX-A3LW-01A	Complete Response	43	218.68.0	Nationwide Children's Hospital	TCGA-DX-A3LW-F42848	D505FBF7-40DA-418F-8631-1D838E4FC66E	TCGA-DX-A3LW			14	1	0			A6836AD9-795D-4F12-9AF9-7E72F046C19F	No	YES				NO	Positive				3	5							No	A3LW	TUMOR FREE	NO		NO			NO	YES	DX	Deep			NO	FALSE
TCGA-DX-A6BB-01A	Complete Response	74	336.56.0	Nationwide Children's Hospital	TCGA-DX-A6BB-F59935	70ECB477-0CFB-4715-9EB5-0393F948D9C2	TCGA-DX-A6BB			14	23	0			E8B4754E-00E6-4EE7-8B97-A94A7C1B6956	No	YES	Conventional leiomyosarcoma	No Major Vessel Involvement	NO	NO	Positive	NO		8	3	5							No	A6BB	WITH TUMOR	NO	NO	NO			NO	YES	DX	Deep	15	Moderate Necrosis (>=10, <50%)		FALSE
TCGA-3B-A9HQ-01A	Complete Response	66	396.46.0	Nationwide Children's Hospital	TCGA-3B-A9HQ-F69075	83F8525D-505D-4205-8DE3-5FDE4098DCE9	TCGA-3B-A9HQ			14	30	0			91120FD3-A57A-4C58-AEE1-F949E02F2EDC	No	YES	Conventional leiomyosarcoma	No Major Vessel Involvement	NO	YES	Negative	NO		10	3	12							No	A9HQ			NO				NO	YES	3B		5	<10% (focal necrosis)		FALSE
TCGA-DX-A6YS-01A	Complete Response	61	363.51.0	Nationwide Children's Hospital	TCGA-DX-A6YS-F59936	9B0E72E8-000E-47D5-AAE4-5EC3B7991CCC	TCGA-DX-A6YS			14	23	0			40136098-D926-43B6-883A-C546C6BFE04D	No	YES			NO	NO	Negative	NO			3	5							No	A6YS	TUMOR FREE	NO		YES			NO	YES	DX	Deep		<10% (focal necrosis)		FALSE
TCGA-X2-A95T-01A	Complete Response	49	383.48.0	Nationwide Children's Hospital	TCGA-X2-A95T-F66293	D7ACA8FA-E28F-468C-B4AC-5FEE9FAAD6ED	TCGA-X2-A95T	NO	Other	14	9	0			AE324A21-0A8F-41E0-B9BF-EE78212FBD3B	No	YES	Poorly differentiated or pleomorphic or epithelioid leiomyosarcoma	No Major Vessel Involvement	NO	NO	Negative	NO		20	3	10						omentum	No	A95T	TUMOR FREE	YES	YES	NO			NO	YES	X2	Superficial	50	Moderate Necrosis (>=10, <50%)		FALSE
TCGA-DX-A7EU-01A	Complete Response	79	375.50.0	Nationwide Children's Hospital	TCGA-DX-A7EU-F65624	FBDDDAAB-93F1-4488-A101-4493E55BD2FE	TCGA-DX-A7EU			14	25	0			19ECE6C4-88AC-4402-84D1-31EE41E74664	No	YES			NO	NO	Negative	NO			3	9							Yes	A7EU	TUMOR FREE	NO		NO			YES	NO	DX	Deep		0% (no necrosis or no mention of necrosis)		FALSE
TCGA-3B-A9I1-01A		56	412.44.0	Nationwide Children's Hospital			TCGA-3B-A9I1	NO		14		0			79E1F4BB-99B3-49A0-ABCD-151A2C0A0141	No	YES	Poorly differentiated or pleomorphic or epithelioid leiomyosarcoma	No Major Vessel Involvement	NO		Negative	YES			3								No	A9I1			YES				NO	YES	3B		10	Moderate Necrosis (>=10, <50%)		FALSE
TCGA-DX-AB37-01A		73	426.42.0	Nationwide Children's Hospital			TCGA-DX-AB37			14		0	-2310	-2310	6FB77A40-15B1-4A63-9834-820E251EEFD3	No	YES			NO		Negative	NO			3								Yes	AB37							NO	YES	DX	Deep		0% (no necrosis or no mention of necrosis)	YES	FALSE
TCGA-DX-A7EF-01A		88	342.56.0	Nationwide Children's Hospital			TCGA-DX-A7EF			14		0			38228ED5-1E1F-46CA-8024-891084567CFC	No	YES			YES		Positive	YES			3								No	A7EF							NO	YES	DX	Deep	10	Moderate Necrosis (>=10, <50%)		FALSE
TCGA-PC-A5DN-01A		77	290.65.0	Nationwide Children's Hospital			TCGA-PC-A5DN			14		0			11E9B29A-6BE9-424C-AA14-294E07E5020B	No	YES	Poorly differentiated or pleomorphic or epithelioid leiomyosarcoma								3								No	A5DN							NO	YES	PC					FALSE
TCGA-SI-A71O-01A	Stable Disease	29	342.56.0	Nationwide Children's Hospital	TCGA-SI-A71O-F62483	86EB72DF-658A-4323-BBE1-3013F06E5D13	TCGA-SI-A71O	NO		14	17	0			F15D3FEE-532E-45F2-99F0-BEB1A6F11A2E	No	YES			NO	NO	Positive	YES		21	3	7	NO	No		No			No	A71O	WITH TUMOR	YES		YES			NO	YES	SI	Deep		0% (no necrosis or no mention of necrosis)		FALSE
TCGA-DX-AB2F-01A	Complete Response	76	396.46.0	Nationwide Children's Hospital	TCGA-DX-AB2F-F65631	54707DCB-82CE-4849-BCAD-C8B1B4E27734	TCGA-DX-AB2F			14	25	0			34C0BC6D-EC9B-4DE2-9193-3AAA726DACB2	No	YES			NO	NO	Positive	NO			3	9							No	AB2F	TUMOR FREE	NO		NO			YES	NO	DX	Deep	25	Moderate Necrosis (>=10, <50%)	NO	FALSE
TCGA-DX-A3LT-01A	Complete Response	62	218.68.0	Nationwide Children's Hospital	TCGA-DX-A3LT-F42844	35C8F8E6-B5F4-441C-95B9-10445EDCBE14	TCGA-DX-A3LT			14	1	0			62E7C572-1AF1-4087-8953-29F8E2450BEB	No	YES				NO	Negative				3	5							No	A3LT	TUMOR FREE	NO		NO			NO	YES	DX	Deep			NO	FALSE
TCGA-SI-A71O-06A	Stable Disease	29	342.56.0	Nationwide Children's Hospital	TCGA-SI-A71O-F62483	86EB72DF-658A-4323-BBE1-3013F06E5D13	TCGA-SI-A71O	NO		14	17	0			F15D3FEE-532E-45F2-99F0-BEB1A6F11A2E	No	YES			NO	NO	Positive	YES		21	3	7	NO	No		No			No	A71O	WITH TUMOR	YES		YES			NO	YES	SI	Deep		0% (no necrosis or no mention of necrosis)		FALSE
TCGA-DX-A3U7-01A	Progressive Disease	67	307.63.0	Nationwide Children's Hospital	TCGA-DX-A3U7-F42861	EEAB1098-A289-421A-8A29-869AED5F6B14	TCGA-DX-A3U7			14	2	0			0E79CFBF-0463-48A3-8DAB-3DFE0FB88C0C	No	YES	Conventional leiomyosarcoma	No Major Vessel Involvement		NO	Negative				3	5							No	A3U7	WITH TUMOR	NO	NO	NO			NO	YES	DX	Superficial				FALSE
TCGA-X6-A8C4-01A	Progressive Disease	70	375.50.0	Nationwide Children's Hospital	TCGA-X6-A8C4-F68087	EDDEEEF8-D2AD-41D5-AEBD-FA917B742061	TCGA-X6-A8C4			14	13	0			A0E9FDDF-4EBF-4884-8C87-CF781F3630E8	No	YES			NO	NO	Positive	NO			3	11							No	A8C4	WITH TUMOR	NO		YES			NO	YES	X6	Deep		Moderate Necrosis (>=10, <50%)		FALSE
TCGA-DX-A6B8-01A		80	310.63.0	Nationwide Children's Hospital			TCGA-DX-A6B8			14		0			EF0AF597-3EC6-40B7-BFDC-38DF8D01CF3E	No	YES	Conventional leiomyosarcoma	No Major Vessel Involvement	NO		Positive	YES			3								No	A6B8			NO				NO	YES	DX	Deep	30	Moderate Necrosis (>=10, <50%)		FALSE
TCGA-PC-A5DL-01A		67	286.63.0	Nationwide Children's Hospital			TCGA-PC-A5DL			14		0			D06BBF9C-4BC6-48B9-9B4F-4611CBD7A8AF	No	YES	Poorly differentiated or pleomorphic or epithelioid leiomyosarcoma								3								No	A5DL			NO				NO	YES	PC					FALSE
[truncated: 54 more columns]

## Sheet: 筛选同一患者-mff
patient_id	primary_tumor_lower_uterus_segment	radiation_therapy	sample_type.samples	margin_status	metastatic_diagnosis	metastatic_site_at_diagnosis_other	local_disease_recurrence
A3PN	YES	NO	Recurrent Tumor	Negative	YES	Abdominal wall	NO
A80J		NO	Primary Tumor	Negative	YES	inguinal lymph node	NO
A42X	YES	NO	Primary Tumor	Negative
A3PO	NO	NO	Primary Tumor	Negative	NO		NO
A2QS		NO	Primary Tumor	Negative	NO
A42X	YES	NO	Recurrent Tumor	Negative
A2QS		NO	Solid Tissue Normal	Negative	NO
A3PN	YES	NO	Primary Tumor	Negative	YES	Abdominal wall	NO
A80J		NO	Recurrent Tumor	Negative	YES	inguinal lymph node	NO
A3PO	NO	NO	Solid Tissue Normal	Negative	NO		NO
A71O		YES	Primary Tumor	Positive	YES		NO
A71O		YES	Metastatic	Positive	YES		NO
